# Supplementary material for: Implementation of the Community Earth System Model (CESM) version 1.2.1 as a new base model into version 2.50 of the MESSy framework
Source: Copernicus journal article supplement (doi:10.5194/gmd-9-125-2016), 2016-01-19
Supplement: Supplementary file 1 [file gmd-9-125-2016-supplement.zip]

Archive with 5 entries (5 files):
- meccanism.pdf
- gmd-9-125-2016-supplement-title-page.pdf
- supplement_CESM1MESSy_implementation_documentation.pdf
- supplement_vertdiff.pdf
- CESM1_namelists.zip
