# Supplementary material for: Implementation of the Community Earth System Model (CESM) version 1.2.1 as a new base model into version 2.50 of the MESSy framework
Source: Copernicus journal article supplement (doi:10.5194/gmd-9-125-2016), 2016-01-19
Supplement: Supplementary file 1 [file gmd-9-125-2016-supplement.zip › gmd-9-125-2016-supplement-title-page.pdf]

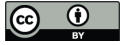

## *Supplement of*

# **Implementation of the Community Earth System Model (CESM) version 1.2.1 as a new base model into version 2.50 of the MESSy framework**

**A. J. G. Baumgaertner et al.**

*Correspondence to:* A. J. G. Baumgaertner ([work@andreas-baumgaertner.net](mailto:work@andreas-baumgaertner.net))

- [gmd-9-125-2016-supplement-title-page.pdf](#)
- [CESM1\\_namelists.zip](#)
- [meccanism.pdf](#)
- [supplement\\_CESM1MESSy\\_implementation\\_documentation.pdf](#)
- [supplement\\_vertdiff.pdf](#)

The copyright of individual parts of the supplement might differ from the CC-BY 3.0 licence.
