# Supplementary material for: Implementation of the Community Earth System Model (CESM) version 1.2.1 as a new base model into version 2.50 of the MESSy framework
Source: Copernicus journal article supplement (doi:10.5194/gmd-9-125-2016), 2016-01-19
Supplement: Supplementary file 1 [file gmd-9-125-2016-supplement.zip › meccanism.pdf]

# The Chemical Mechanism of MECCA

KPP version: 2.2.1\_rs5

MECCA version: 3.6

Date: February 9, 2014.

Selected reactions:

“(((Tr && (G | Het) && !I) | St) && !Hg)”

Number of aerosol phases: 0

Number of species in selected mechanism:

Gas phase: 155

Aqueous phase: 0

All species: 155

Number of reactions in selected mechanism:

Gas phase (Gnn): 224

Aqueous phase (Annn): 0

Henry (Hnn): 0

Photolysis (Jnn): 74

Aqueous phase photolysis (PHnn): 0

Heterogeneous (HETnn): 12

Equilibria (EQnn): 0

Isotope exchange (DGNnn): 0

Dummy (Dnn): 0

All equations: 310

This document is part of the electronic supplement to our article  
“The atmospheric chemistry box model CAABA/MECCA-3.0”  
in Geosci. Model Dev. (2011), available at:  
<http://www.geosci-model-dev.net>

Table 1: Gas phase reactions

| #      | labels   | reaction                                                                                                                      | rate coefficient                                       | reference                                             |
|--------|----------|-------------------------------------------------------------------------------------------------------------------------------|--------------------------------------------------------|-------------------------------------------------------|
| G1000  | UpStTrG  | $O_2 + O(^1D) \rightarrow O(^3P) + O_2$                                                                                       | $3.3E-11*EXP(55./temp)$                                | Sander et al. (2011)                                  |
| G1001  | UpStTrG  | $O_2 + O(^3P) \rightarrow O_3$                                                                                                | $6.E-34*((temp/300.)**(-2.4))*cair$                    | Sander et al. (2011)                                  |
| G1002a | UpStG    | $O_3 + O(^1D) \rightarrow 2.0 \text{ LossO3O} + 2. \text{ LossO3} + 2 O_2$                                                    | $1.2E-10$                                              | Sander et al. (2011)*                                 |
| G1003  | UpStG    | $O_3 + O(^3P) \rightarrow 2.0 \text{ LossO3O} + 2. \text{ LossO3} + 2 O_2$                                                    | $8.E-12*EXP(-2060./temp)$                              | Sander et al. (2011)                                  |
| G2100  | UpStTrG  | $H + O_2 \rightarrow HO_2$                                                                                                    | $k\_3rd(temp, cair, 4.4E-32, 1.3, 7.5E-11, -0.2, 0.6)$ | Sander et al. (2011)                                  |
| G2101  | UpStG    | $H + O_3 \rightarrow \text{LossO3H} + 1. \text{ LossO3} + OH + O_2$                                                           | $1.4E-10*EXP(-470./temp)$                              | Sander et al. (2011)                                  |
| G2102  | UpStG    | $H_2 + O(^1D) \rightarrow \text{LossO3H} + 1. \text{ LossO3} + H + OH$                                                        | $1.2E-10$                                              | Sander et al. (2011)                                  |
| G2103  | UpStG    | $OH + O(^3P) \rightarrow \text{LossO3H} + 1. \text{ LossO3} + H + O_2$                                                        | $1.8E-11*EXP(180./temp)$                               | Sander et al. (2011)                                  |
| G2104  | UpStTrG  | $OH + O_3 \rightarrow 1.0 \text{ LossG2104} + \text{LossO3H} + \text{LossOH} + 1. \text{ LossO3} + HO_2 + O_2$                | $1.7E-12*EXP(-940./temp)$                              | Sander et al. (2011)                                  |
| G2105  | UpStTrG  | $OH + H_2 \rightarrow H_2O + H$                                                                                               | $2.8E-12*EXP(-1800./temp)$                             | Sander et al. (2011)                                  |
| G2106  | UpStG    | $HO_2 + O(^3P) \rightarrow 1.0 \text{ LossG2106} + \text{LossO3H} + 1. \text{ LossO3} + OH + O_2$                             | $3.E-11*EXP(200./temp)$                                | Sander et al. (2011)                                  |
| G2107  | UpStTrG  | $HO_2 + O_3 \rightarrow 1.0 \text{ LossG2107} + \text{LossO3H} + \text{LossHO2} + 1. \text{ LossO3} + OH + 2 O_2$             | $1.E-14*EXP(-490./temp)$                               | Sander et al. (2011)                                  |
| G2108a | UpStG    | $HO_2 + H \rightarrow 2 OH$                                                                                                   | $7.2E-11$                                              | Sander et al. (2011)                                  |
| G2108b | UpStG    | $HO_2 + H \rightarrow H_2 + O_2$                                                                                              | $6.9E-12$                                              | Sander et al. (2011)                                  |
| G2108c | UpStG    | $HO_2 + H \rightarrow \text{LossO3Hn} + 1. \text{ ProdO3} + O(^3P) + H_2O$                                                    | $1.6E-12$                                              | Sander et al. (2011)                                  |
| G2109  | UpStTrG  | $HO_2 + OH \rightarrow H_2O + O_2$                                                                                            | $4.8E-11*EXP(250./temp)$                               | Sander et al. (2011)                                  |
| G2110  | UpStTrG  | $HO_2 + HO_2 \rightarrow 1.0 \text{ LossG2110} + H_2O_2 + O_2$                                                                | $k\_H02\_H02$                                          | Christensen et al. (2002), Kircher and Sander (1984)* |
| G2111  | UpStTrG  | $H_2O + O(^1D) \rightarrow \text{LossO3O} + \text{LossO1D} + 1. \text{ LossO3} + 2 OH$                                        | $1.63E-10*EXP(60./temp)$                               | Sander et al. (2011)                                  |
| G2112  | UpStTrG  | $H_2O_2 + OH \rightarrow H_2O + HO_2$                                                                                         | $1.8E-12$                                              | Sander et al. (2011)                                  |
| G3100  | UpStGN   | $N + O_2 \rightarrow \text{LossO3Nn} + 1. \text{ ProdO3} + NO + O(^3P)$                                                       | $1.5E-11*EXP(-3600./temp)$                             | Sander et al. (2011)                                  |
| G3101  | UpStTrGN | $N_2 + O(^1D) \rightarrow O(^3P) + N_2$                                                                                       | $2.15E-11*EXP(110./temp)$                              | Sander et al. (2011)                                  |
| G3102a | UpStGN   | $N_2O + O(^1D) \rightarrow \text{LossO3O} + 1. \text{ LossO3} + 2 NO$                                                         | $7.25E-11*EXP(20./temp)$                               | Sander et al. (2011)                                  |
| G3102b | StGN     | $N_2O + O(^1D) \rightarrow \text{LossO3O} + 1. \text{ LossO3} + N_2 + O_2$                                                    | $4.63E-11*EXP(20./temp)$                               | Sander et al. (2011)                                  |
| G3103  | UpStTrGN | $NO + O_3 \rightarrow 1.0 \text{ LossG3103} + NO_2 + O_2$                                                                     | $3.E-12*EXP(-1500./temp)$                              | Sander et al. (2011)                                  |
| G3104  | UpStGN   | $NO + N \rightarrow \text{LossO3Nn} + 1. \text{ ProdO3} + O(^3P) + N_2$                                                       | $2.1E-11*EXP(100./temp)$                               | Sander et al. (2011)                                  |
| G3105  | UpStGN   | $NO_2 + O(^3P) \rightarrow 1.0 \text{ LossG3105} + 2.0 \text{ LossO3N2} + 2.0 \text{ LossO3N} + 2. \text{ LossO3} + NO + O_2$ | $5.1E-12*EXP(210./temp)$                               | Sander et al. (2011)                                  |
| G3106  | StTrGN   | $NO_2 + O_3 \rightarrow 1.0 \text{ LossG3106} + NO_3 + O_2$                                                                   | $1.2E-13*EXP(-2450./temp)$                             | Sander et al. (2011)                                  |

Table 1: Gas phase reactions (... continued)

| #     | labels   | reaction                                                                                                                                                             | rate coefficient                                                                         | reference                 |
|-------|----------|----------------------------------------------------------------------------------------------------------------------------------------------------------------------|------------------------------------------------------------------------------------------|---------------------------|
| G3107 | UpStGN   | $\text{NO}_2 + \text{N} \rightarrow \text{N}_2\text{O} + \text{O}(^3\text{P})$                                                                                       | $5.8\text{E-}12*\text{EXP}(220./\text{temp})$                                            | Sander et al. (2011)      |
| G3108 | StTrGN   | $\text{NO}_3 + \text{NO} \rightarrow 2 \text{NO}_2$                                                                                                                  | $1.5\text{E-}11*\text{EXP}(170./\text{temp})$                                            | Sander et al. (2011)      |
| G3109 | UpStTrGN | $\text{NO}_3 + \text{NO}_2 \rightarrow \text{N}_2\text{O}_5$                                                                                                         | $\text{k\_NO3\_NO2}$                                                                     | Sander et al. (2011)*     |
| G3110 | StTrGN   | $\text{N}_2\text{O}_5 \rightarrow \text{NO}_2 + \text{NO}_3$                                                                                                         | $\text{k\_NO3\_NO2}/(2.7\text{E-}27*\text{EXP}(11000./\text{temp}))$                     | Sander et al. (2011)*     |
| G3200 | TrGN     | $\text{NO} + \text{OH} \rightarrow \text{HONO}$                                                                                                                      | $\text{k\_3rd}(\text{temp}, \text{cair}, 7.0\text{E-}31, 2.6, 3.6\text{E-}11, 0.1, 0.6)$ | Sander et al. (2011)      |
| G3201 | UpStTrGN | $\text{NO} + \text{HO}_2 \rightarrow 1.0 \text{ LossG3201} + \text{ProdHO2} + 1. \text{ ProdO3} + \text{NO}_2 + \text{OH}$                                           | $3.3\text{E-}12*\text{EXP}(270./\text{temp})$                                            | Sander et al. (2011)      |
| G3202 | UpStTrGN | $\text{NO}_2 + \text{OH} \rightarrow 1.0 \text{ LossG3202} + \text{HNO}_3$                                                                                           | $\text{k\_3rd}(\text{temp}, \text{cair}, 1.8\text{E-}30, 3.0, 2.8\text{E-}11, 0., 0.6)$  | Sander et al. (2011)      |
| G3203 | StTrGN   | $\text{NO}_2 + \text{HO}_2 \rightarrow \text{HNO}_4$                                                                                                                 | $\text{k\_NO2\_HO2}$                                                                     | Sander et al. (2011)*     |
| G3204 | TrGN     | $\text{NO}_3 + \text{HO}_2 \rightarrow \text{LossO3N} + 1. \text{ LossO3} + \text{NO}_2 + \text{OH} + \text{O}_2$                                                    | $3.5\text{E-}12$                                                                         | Sander et al. (2011)      |
| G3205 | TrGN     | $\text{HONO} + \text{OH} \rightarrow \text{LossO3Nn} + 1. \text{ ProdO3} + \text{NO}_2 + \text{H}_2\text{O}$                                                         | $1.8\text{E-}11*\text{EXP}(-390./\text{temp})$                                           | Sander et al. (2011)      |
| G3206 | StTrGN   | $\text{HNO}_3 + \text{OH} \rightarrow \text{LossO3Nn} + 1. \text{ ProdO3} + \text{H}_2\text{O} + \text{NO}_3$                                                        | $\text{k\_HNO3\_OH}$                                                                     | Sander et al. (2011)*     |
| G3207 | StTrGN   | $\text{HNO}_4 \rightarrow \text{NO}_2 + \text{HO}_2$                                                                                                                 | $\text{k\_NO2\_HO2}/(2.1\text{E-}27*\text{EXP}(10900./\text{temp}))$                     | Sander et al. (2011)*     |
| G3208 | StTrGN   | $\text{HNO}_4 + \text{OH} \rightarrow \text{NO}_2 + \text{H}_2\text{O}$                                                                                              | $1.3\text{E-}12*\text{EXP}(380./\text{temp})$                                            | Sander et al. (2011)      |
| G3209 | TrGN     | $\text{NH}_3 + \text{OH} \rightarrow \text{NH}_2 + \text{H}_2\text{O}$                                                                                               | $1.7\text{E-}12*\text{EXP}(-710./\text{temp})$                                           | Kohlmann and Poppe (1999) |
| G3210 | TrGN     | $\text{NH}_2 + \text{O}_3 \rightarrow 1. \text{ LossO3} + \text{NH}_2\text{O} + \text{O}_2$                                                                          | $4.3\text{E-}12*\text{EXP}(-930./\text{temp})$                                           | Kohlmann and Poppe (1999) |
| G3211 | TrGN     | $\text{NH}_2 + \text{HO}_2 \rightarrow \text{NH}_2\text{O} + \text{OH}$                                                                                              | $4.8\text{E-}07*\text{EXP}(-628./\text{temp})*\text{temp}**(-1.32)$                      | Kohlmann and Poppe (1999) |
| G3212 | TrGN     | $\text{NH}_2 + \text{HO}_2 \rightarrow \text{HNO} + \text{H}_2\text{O}$                                                                                              | $9.4\text{E-}09*\text{EXP}(-356./\text{temp})*\text{temp}**(-1.12)$                      | Kohlmann and Poppe (1999) |
| G3213 | TrGN     | $\text{NH}_2 + \text{NO} \rightarrow \text{HO}_2 + \text{OH} + \text{N}_2$                                                                                           | $1.92\text{E-}12*((\text{temp}/298.)*(-1.5))$                                            | Kohlmann and Poppe (1999) |
| G3214 | TrGN     | $\text{NH}_2 + \text{NO} \rightarrow \text{N}_2 + \text{H}_2\text{O}$                                                                                                | $1.41\text{E-}11*((\text{temp}/298.)*(-1.5))$                                            | Kohlmann and Poppe (1999) |
| G3215 | TrGN     | $\text{NH}_2 + \text{NO}_2 \rightarrow 1. \text{ LossO3} + \text{N}_2\text{O} + \text{H}_2\text{O}$                                                                  | $1.2\text{E-}11*((\text{temp}/298.)*(-2.0))$                                             | Kohlmann and Poppe (1999) |
| G3216 | TrGN     | $\text{NH}_2 + \text{NO}_2 \rightarrow 1. \text{ LossO3} + \text{NH}_2\text{O} + \text{NO}$                                                                          | $0.8\text{E-}11*((\text{temp}/298.)*(-2.0))$                                             | Kohlmann and Poppe (1999) |
| G3217 | TrGN     | $\text{NH}_2\text{O} + \text{O}_3 \rightarrow 1. \text{ LossO3} + \text{NH}_2 + \text{O}_2$                                                                          | $1.2\text{E-}14$                                                                         | Kohlmann and Poppe (1999) |
| G3218 | TrGN     | $\text{NH}_2\text{O} \rightarrow \text{NHOH}$                                                                                                                        | $1.3\text{E3}$                                                                           | Kohlmann and Poppe (1999) |
| G3219 | TrGN     | $\text{HNO} + \text{OH} \rightarrow \text{NO} + \text{H}_2\text{O}$                                                                                                  | $8.0\text{E-}11*\text{EXP}(-500./\text{temp})$                                           | Kohlmann and Poppe (1999) |
| G3220 | TrGN     | $\text{HNO} + \text{NHOH} \rightarrow \text{NH}_2\text{OH} + \text{NO}$                                                                                              | $1.66\text{E-}12*\text{EXP}(-1500./\text{temp})$                                         | Kohlmann and Poppe (1999) |
| G3221 | TrGN     | $\text{HNO} + \text{NO}_2 \rightarrow 1. \text{ LossO3} + \text{HONO} + \text{NO}$                                                                                   | $1.0\text{E-}12*\text{EXP}(-1000./\text{temp})$                                          | Kohlmann and Poppe (1999) |
| G3222 | TrGN     | $\text{NHOH} + \text{OH} \rightarrow \text{HNO} + \text{H}_2\text{O}$                                                                                                | $1.66\text{E-}12$                                                                        | Kohlmann and Poppe (1999) |
| G3223 | TrGN     | $\text{NH}_2\text{OH} + \text{OH} \rightarrow \text{NHOH} + \text{H}_2\text{O}$                                                                                      | $4.13\text{E-}11*\text{EXP}(-2138./\text{temp})$                                         | Kohlmann and Poppe (1999) |
| G3224 | TrGN     | $\text{HNO} + \text{O}_2 \rightarrow \text{HO}_2 + \text{NO}$                                                                                                        | $3.65\text{E-}14*\text{EXP}(-4600./\text{temp})$                                         | Kohlmann and Poppe (1999) |
| G4100 | UpStG    | $\text{CH}_4 + \text{O}(^1\text{D}) \rightarrow 1. \text{ LossO3} + .75 \text{ CH}_3\text{O}_2 + .75 \text{ OH} + .25 \text{ HCHO} + .4 \text{ H} + .05 \text{ H}_2$ | $1.75\text{E-}10$                                                                        | Sander et al. (2011)      |
| G4101 | StTrG    | $\text{CH}_4 + \text{OH} \rightarrow \text{CH}_3\text{O}_2 + \text{H}_2\text{O}$                                                                                     | $1.85\text{E-}20*\text{EXP}(2.82*\log(\text{temp})-987./\text{temp})$                    | Atkinson (2003)           |

Table 1: Gas phase reactions (... continued)

| #      | labels   | reaction                                                                                                                                                                                                                             | rate coefficient                                                                                       | reference                 |
|--------|----------|--------------------------------------------------------------------------------------------------------------------------------------------------------------------------------------------------------------------------------------|--------------------------------------------------------------------------------------------------------|---------------------------|
| G4102  | TrG      | $\text{CH}_3\text{OH} + \text{OH} \rightarrow \text{HCHO} + \text{HO}_2$                                                                                                                                                             | $2.9\text{E-}12 \cdot \text{EXP}(-345./\text{temp})$                                                   | Sander et al. (2011)      |
| G4103  | StTrG    | $\text{CH}_3\text{O}_2 + \text{HO}_2 \rightarrow \text{CH}_3\text{OOH} + \text{O}_2$                                                                                                                                                 | $4.1\text{E-}13 \cdot \text{EXP}(750./\text{temp})$                                                    | Sander et al. (2011)*     |
| G4104  | UpStTrGN | $\text{CH}_3\text{O}_2 + \text{NO} \rightarrow \text{ProdMeO2} + 1. \text{ ProdO3} + \text{HCHO} + \text{NO}_2 + \text{HO}_2$                                                                                                        | $2.8\text{E-}12 \cdot \text{EXP}(300./\text{temp})$                                                    | Sander et al. (2011)      |
| G4105  | TrGN     | $\text{CH}_3\text{O}_2 + \text{NO}_3 \rightarrow \text{LossO3N} + 1. \text{ LossO3} + \text{HCHO} + \text{HO}_2 + \text{NO}_2$                                                                                                       | 1.3E-12                                                                                                | Atkinson et al. (2006)    |
| G4106a | StTrG    | $\text{CH}_3\text{O}_2 + \text{CH}_3\text{O}_2 \rightarrow 2 \text{ HCHO} + 2 \text{ HO}_2$                                                                                                                                          | $9.5\text{E-}14 \cdot \text{EXP}(390./\text{temp}) / (1.+1./26.2 \cdot \text{EXP}(1130./\text{temp}))$ | Sander et al. (2011)      |
| G4106b | StTrG    | $\text{CH}_3\text{O}_2 + \text{CH}_3\text{O}_2 \rightarrow \text{HCHO} + \text{CH}_3\text{OH} + \text{O}_2$                                                                                                                          | $9.5\text{E-}14 \cdot \text{EXP}(390./\text{temp}) / (1.+26.2 \cdot \text{EXP}(-1130./\text{temp}))$   | Sander et al. (2011)      |
| G4107  | StTrG    | $\text{CH}_3\text{OOH} + \text{OH} \rightarrow .7 \text{ CH}_3\text{O}_2 + .3 \text{ HCHO} + .3 \text{ OH} + \text{H}_2\text{O}$                                                                                                     | k_CH300H_OH                                                                                            | Sander et al. (2011)*     |
| G4108  | StTrG    | $\text{HCHO} + \text{OH} \rightarrow \text{CO} + \text{H}_2\text{O} + \text{HO}_2$                                                                                                                                                   | $9.52\text{E-}18 \cdot \text{EXP}(2.03 \cdot \log(\text{temp}) + 636./\text{temp})$                    | Sivakumaran et al. (2003) |
| G4109  | TrGN     | $\text{HCHO} + \text{NO}_3 \rightarrow \text{LossO3N} + 1. \text{ LossO3} + \text{HNO}_3 + \text{CO} + \text{HO}_2$                                                                                                                  | $3.4\text{E-}13 \cdot \text{EXP}(-1900./\text{temp})$                                                  | Sander et al. (2011)*     |
| G4110  | UpStTrG  | $\text{CO} + \text{OH} \rightarrow 1.0 \text{ LossG4110} + \text{H} + \text{CO}_2$                                                                                                                                                   | $(1.57\text{E-}13 + \text{cair} \cdot 3.54\text{E-}33)$                                                | McCabe et al. (2001)      |
| G4111  | TrG      | $\text{HCOOH} + \text{OH} \rightarrow \text{CO}_2 + \text{HO}_2 + \text{H}_2\text{O}$                                                                                                                                                | 4.0E-13                                                                                                | Sander et al. (2011)      |
| G4200  | TrGC     | $\text{C}_2\text{H}_6 + \text{OH} \rightarrow \text{C}_2\text{H}_5\text{O}_2 + \text{H}_2\text{O}$                                                                                                                                   | $1.49\text{E-}17 \cdot \text{temp} \cdot \text{temp} \cdot \text{EXP}(-499./\text{temp})$              | Atkinson (2003)           |
| G4201  | TrGC     | $\text{C}_2\text{H}_4 + \text{O}_3 \rightarrow \text{LossO3R} + 1. \text{ LossO3} + \text{HCHO} + .63 \text{ CO} + .13 \text{ HO}_2 + 0.23125 \text{ HCOOH} + 0.13875 \text{ HCHO} + 0.13875 \text{ H}_2\text{O}_2 + .13 \text{ OH}$ | $1.2\text{E-}14 \cdot \text{EXP}(-2630./\text{temp})$                                                  | Sander et al. (2011)*     |
| G4202  | TrGC     | $\text{C}_2\text{H}_4 + \text{OH} \rightarrow .6666667 \text{ CH}_3\text{CH}(\text{O}_2)\text{CH}_2\text{OH}$                                                                                                                        | k_3rd(temp, cair, 1.0E-28, 4.5, 7.5E-12, 0.85, 0.6)                                                    | Sander et al. (2011)      |
| G4203  | TrGC     | $\text{C}_2\text{H}_5\text{O}_2 + \text{HO}_2 \rightarrow \text{C}_2\text{H}_5\text{OOH}$                                                                                                                                            | $7.5\text{E-}13 \cdot \text{EXP}(700./\text{temp})$                                                    | Sander et al. (2011)      |
| G4204  | TrGNC    | $\text{C}_2\text{H}_5\text{O}_2 + \text{NO} \rightarrow \text{ProdRO2} + 1. \text{ ProdO3} + \text{CH}_3\text{CHO} + \text{HO}_2 + \text{NO}_2$                                                                                      | $2.6\text{E-}12 \cdot \text{EXP}(365./\text{temp})$                                                    | Sander et al. (2011)      |
| G4205  | TrGNC    | $\text{C}_2\text{H}_5\text{O}_2 + \text{NO}_3 \rightarrow 1. \text{ LossO3} + \text{CH}_3\text{CHO} + \text{HO}_2 + \text{NO}_2$                                                                                                     | 2.3E-12                                                                                                | Atkinson et al. (1999)    |
| G4206  | TrGC     | $\text{C}_2\text{H}_5\text{O}_2 + \text{CH}_3\text{O}_2 \rightarrow .75 \text{ HCHO} + \text{HO}_2 + .75 \text{ CH}_3\text{CHO} + .25 \text{ CH}_3\text{OH}$                                                                         | $1.6\text{E-}13 \cdot \text{EXP}(195./\text{temp})$                                                    | see note                  |
| G4207  | TrGC     | $\text{C}_2\text{H}_5\text{OOH} + \text{OH} \rightarrow .3 \text{ C}_2\text{H}_5\text{O}_2 + .7 \text{ CH}_3\text{CHO} + .7 \text{ OH}$                                                                                              | k_CH300H_OH                                                                                            | see note                  |
| G4208  | TrGC     | $\text{CH}_3\text{CHO} + \text{OH} \rightarrow \text{CH}_3\text{C}(\text{O})\text{OO} + \text{H}_2\text{O}$                                                                                                                          | $4.4\text{E-}12 \cdot \text{EXP}(365./\text{temp})$                                                    | Atkinson et al. (2006)    |
| G4209  | TrGNC    | $\text{CH}_3\text{CHO} + \text{NO}_3 \rightarrow \text{LossO3N} + 1. \text{ LossO3} + \text{CH}_3\text{C}(\text{O})\text{OO} + \text{HNO}_3$                                                                                         | $1.4\text{E-}12 \cdot \text{EXP}(-1900./\text{temp})$                                                  | Sander et al. (2011)      |
| G4210  | TrGC     | $\text{CH}_3\text{COOH} + \text{OH} \rightarrow \text{CH}_3\text{O}_2 + \text{CO}_2 + \text{H}_2\text{O}$                                                                                                                            | $4.2\text{E-}14 \cdot \text{EXP}(855./\text{temp})$                                                    | Atkinson et al. (2006)    |
| G4211a | TrGC     | $\text{CH}_3\text{C}(\text{O})\text{OO} + \text{HO}_2 \rightarrow \text{CH}_3\text{C}(\text{O})\text{OOH}$                                                                                                                           | $4.3\text{E-}13 \cdot \text{EXP}(1040./\text{temp}) / (1.+1./37. \cdot \text{EXP}(660./\text{temp}))$  | Tyndall et al. (2001)     |

Table 1: Gas phase reactions (... continued)

| #      | labels | reaction                                                                                                                                                                                                                                                                                                                                                                            | rate coefficient                                                                       | reference                                              |
|--------|--------|-------------------------------------------------------------------------------------------------------------------------------------------------------------------------------------------------------------------------------------------------------------------------------------------------------------------------------------------------------------------------------------|----------------------------------------------------------------------------------------|--------------------------------------------------------|
| G4211b | TrGC   | $\text{CH}_3\text{C}(\text{O})\text{OO} + \text{HO}_2 \rightarrow 1. \text{ProdO3} + \text{CH}_3\text{COOH} + \text{O}_3$                                                                                                                                                                                                                                                           | $4.3\text{E-}13*\text{EXP}(1040./\text{temp})/(1.+37.*\text{EXP}(-660./\text{temp}))$  | Tyndall et al. (2001)                                  |
| G4212  | TrGNC  | $\text{CH}_3\text{C}(\text{O})\text{OO} + \text{NO} \rightarrow \text{ProdRO2} + 1. \text{ProdO3} + \text{CH}_3\text{O}_2 + \text{CO}_2 + \text{NO}_2$                                                                                                                                                                                                                              | $8.1\text{E-}12*\text{EXP}(270./\text{temp})$                                          | Tyndall et al. (2001)                                  |
| G4213  | TrGNC  | $\text{CH}_3\text{C}(\text{O})\text{OO} + \text{NO}_2 \rightarrow \text{PAN}$                                                                                                                                                                                                                                                                                                       | $k_{\text{PA\_NO2}}$                                                                   | Sander et al. (2011)                                   |
| G4214  | TrGNC  | $\text{CH}_3\text{C}(\text{O})\text{OO} + \text{NO}_3 \rightarrow \text{LossO3N} + 1. \text{LossO3} + \text{CH}_3\text{O}_2 + \text{NO}_2 + \text{CO}_2$                                                                                                                                                                                                                            | $4.\text{E-}12$                                                                        | Canosa-Mas et al. (1996)                               |
| G4215a | TrGC   | $\text{CH}_3\text{C}(\text{O})\text{OO} + \text{CH}_3\text{O}_2 \rightarrow \text{HCHO} + \text{HO}_2 + \text{CH}_3\text{O}_2 + \text{CO}_2$                                                                                                                                                                                                                                        | $0.9*2.0\text{E-}12*\text{EXP}(500./\text{temp})$                                      | Sander et al. (2011)                                   |
| G4215b | TrGC   | $\text{CH}_3\text{C}(\text{O})\text{OO} + \text{CH}_3\text{O}_2 \rightarrow \text{CH}_3\text{COOH} + \text{HCHO}$                                                                                                                                                                                                                                                                   | $0.1*2.0\text{E-}12*\text{EXP}(500./\text{temp})$                                      | Sander et al. (2011)                                   |
| G4216  | TrGC   | $\text{CH}_3\text{C}(\text{O})\text{OO} + \text{C}_2\text{H}_5\text{O}_2 \rightarrow .82 \text{CH}_3\text{O}_2 + \text{CH}_3\text{CHO} + .82 \text{HO}_2 + .18 \text{CH}_3\text{COOH}$                                                                                                                                                                                              | $4.9\text{E-}12*\text{EXP}(211./\text{temp})$                                          | Atkinson et al. (1999), Kirchner and Stockwell (1996)* |
| G4217  | TrGC   | $\text{CH}_3\text{C}(\text{O})\text{OO} + \text{CH}_3\text{C}(\text{O})\text{OO} \rightarrow 2 \text{CH}_3\text{O}_2 + 2 \text{CO}_2 + \text{O}_2$                                                                                                                                                                                                                                  | $2.5\text{E-}12*\text{EXP}(500./\text{temp})$                                          | Tyndall et al. (2001)                                  |
| G4218  | TrGC   | $\text{CH}_3\text{C}(\text{O})\text{OOH} + \text{OH} \rightarrow \text{CH}_3\text{C}(\text{O})\text{OO} + \text{H}_2\text{O}$                                                                                                                                                                                                                                                       | $0.6*k_{\text{CH300H\_OH}}$                                                            | Rickard and Pascoe (2009)*                             |
| G4219  | TrGNC  | $\text{NACA} + \text{OH} \rightarrow \text{NO}_2 + \text{HCHO} + \text{CO}$                                                                                                                                                                                                                                                                                                         | $5.6\text{E-}12*\text{EXP}(270./\text{temp})$                                          | see note                                               |
| G4220  | TrGNC  | $\text{PAN} + \text{OH} \rightarrow \text{HCHO} + \text{CO} + \text{NO}_2 + \text{H}_2\text{O}$                                                                                                                                                                                                                                                                                     | $9.50\text{E-}13*\text{EXP}(-650./\text{temp})$                                        | Rickard and Pascoe (2009)                              |
| G4221  | TrGNC  | $\text{PAN} \rightarrow \text{CH}_3\text{C}(\text{O})\text{OO} + \text{NO}_2$                                                                                                                                                                                                                                                                                                       | $k_{\text{PAN\_M}}$                                                                    | Sander et al. (2011)*                                  |
| G4300  | TrGC   | $\text{C}_3\text{H}_8 + \text{OH} \rightarrow .82 \text{iC}_3\text{H}_7\text{O}_2 + .18 \text{C}_2\text{H}_5\text{O}_2 + \text{H}_2\text{O}$                                                                                                                                                                                                                                        | $1.65\text{E-}17*\text{temp}*\text{temp}*\text{EXP}(-87./\text{temp})$                 | Atkinson (2003)                                        |
| G4301  | TrGC   | $\text{C}_3\text{H}_6 + \text{O}_3 \rightarrow \text{LossO3R} + 1. \text{LossO3} + .57 \text{HCHO} + .47 \text{CH}_3\text{CHO} + .33 \text{OH} + .26 \text{HO}_2 + .07 \text{CH}_3\text{O}_2 + .06 \text{C}_2\text{H}_5\text{O}_2 + .23 \text{CH}_3\text{C}(\text{O})\text{OO} + .04 \text{MGLYOX} + .06 \text{CH}_4 + .31 \text{CO} + .22 \text{HCOOH} + .03 \text{CH}_3\text{OH}$ | $6.5\text{E-}15*\text{EXP}(-1900./\text{temp})$                                        | Sander et al. (2011)*                                  |
| G4302  | TrGC   | $\text{C}_3\text{H}_6 + \text{OH} \rightarrow \text{CH}_3\text{CH}(\text{O}_2)\text{CH}_2\text{OH}$                                                                                                                                                                                                                                                                                 | $k_{\text{3rd}}(\text{temp}, \text{cair}, 8.\text{E-}27, 3.5, 3.\text{E-}11, 0., 0.5)$ | Atkinson et al. (1999)                                 |
| G4303  | TrGNC  | $\text{C}_3\text{H}_6 + \text{NO}_3 \rightarrow 1. \text{LossO3} + \text{LC4H9NO3}$                                                                                                                                                                                                                                                                                                 | $4.6\text{E-}13*\text{EXP}(-1155./\text{temp})$                                        | Atkinson et al. (1999)                                 |
| G4304  | TrGC   | $\text{iC}_3\text{H}_7\text{O}_2 + \text{HO}_2 \rightarrow \text{iC}_3\text{H}_7\text{OOH}$                                                                                                                                                                                                                                                                                         | $k_{\text{Pr02\_H02}}$                                                                 | Atkinson (1997)*                                       |
| G4305  | TrGNC  | $\text{iC}_3\text{H}_7\text{O}_2 + \text{NO} \rightarrow \text{ProdRO2} + 1. \text{ProdO3} + .96 \text{CH}_3\text{COCH}_3 + .96 \text{HO}_2 + .96 \text{NO}_2 + .04 \text{iC}_3\text{H}_7\text{ONO}_2$                                                                                                                                                                              | $k_{\text{Pr02\_N0}}$                                                                  | Atkinson et al. (1999)*                                |
| G4306  | TrGC   | $\text{iC}_3\text{H}_7\text{O}_2 + \text{CH}_3\text{O}_2 \rightarrow \text{CH}_3\text{COCH}_3 + .8 \text{HCHO} + .8 \text{HO}_2 + .2 \text{CH}_3\text{OH}$                                                                                                                                                                                                                          | $k_{\text{Pr02\_CH302}}$                                                               | Kirchner and Stockwell (1996)                          |
| G4307  | TrGC   | $\text{iC}_3\text{H}_7\text{OOH} + \text{OH} \rightarrow .3 \text{iC}_3\text{H}_7\text{O}_2 + .7 \text{CH}_3\text{COCH}_3 + .7 \text{OH}$                                                                                                                                                                                                                                           | $k_{\text{CH300H\_OH}}$                                                                | see note                                               |
| G4308  | TrGC   | $\text{CH}_3\text{CH}(\text{O}_2)\text{CH}_2\text{OH} + \text{HO}_2 \rightarrow \text{CH}_3\text{CH}(\text{OOH})\text{CH}_2\text{OH}$                                                                                                                                                                                                                                               | $6.5\text{E-}13*\text{EXP}(650./\text{temp})$                                          | Müller and Brasseur (1995)                             |
| G4309  | TrGNC  | $\text{CH}_3\text{CH}(\text{O}_2)\text{CH}_2\text{OH} + \text{NO} \rightarrow \text{ProdRO2} + 1. \text{ProdO3} + .98 \text{CH}_3\text{CHO} + .98 \text{HCHO} + .98 \text{HO}_2 + .98 \text{NO}_2 + .02 \text{LC4H9NO3}$                                                                                                                                                            | $4.2\text{E-}12*\text{EXP}(180./\text{temp})$                                          | Müller and Brasseur (1995)*                            |

Table 1: Gas phase reactions (... continued)

| #     | labels | reaction                                                                                                                                                                                                                                                | rate coefficient                                                                                       | reference                  |
|-------|--------|---------------------------------------------------------------------------------------------------------------------------------------------------------------------------------------------------------------------------------------------------------|--------------------------------------------------------------------------------------------------------|----------------------------|
| G4310 | TrGC   | $\text{CH}_3\text{CH}(\text{OOH})\text{CH}_2\text{OH} + \text{OH} \rightarrow .5 \text{CH}_3\text{CH}(\text{O}_2)\text{CH}_2\text{OH} + .5 \text{CH}_3\text{COCH}_2\text{OH} + .5 \text{OH} + \text{H}_2\text{O}$                                       | $3.8\text{E-}12*\text{EXP}(200./\text{temp})$                                                          | Müller and Brasseur (1995) |
| G4311 | TrGC   | $\text{CH}_3\text{COCH}_3 + \text{OH} \rightarrow \text{CH}_3\text{COCH}_2\text{O}_2 + \text{H}_2\text{O}$                                                                                                                                              | $1.33\text{E-}13+3.82\text{E-}11*\text{EXP}(-2000./\text{temp})$                                       | Sander et al. (2011)       |
| G4312 | TrGC   | $\text{CH}_3\text{COCH}_2\text{O}_2 + \text{HO}_2 \rightarrow \text{CH}_3\text{COCH}_2\text{O}_2\text{H}$                                                                                                                                               | $8.6\text{E-}13*\text{EXP}(700./\text{temp})$                                                          | Tyndall et al. (2001)      |
| G4313 | TrGNC  | $\text{CH}_3\text{COCH}_2\text{O}_2 + \text{NO} \rightarrow \text{ProdRO2} + 1. \text{ProdO3} + \text{CH}_3\text{C}(\text{O})\text{OO} + \text{HCHO} + \text{NO}_2$                                                                                     | $2.9\text{E-}12*\text{EXP}(300./\text{temp})$                                                          | Sander et al. (2011)       |
| G4314 | TrGC   | $\text{CH}_3\text{COCH}_2\text{O}_2 + \text{CH}_3\text{O}_2 \rightarrow .5 \text{MGLYOX} + .5 \text{CH}_3\text{OH} + .3 \text{CH}_3\text{C}(\text{O})\text{OO} + .8 \text{HCHO} + .3 \text{HO}_2 + .2 \text{CH}_3\text{COCH}_2\text{OH}$                | $7.5\text{E-}13*\text{EXP}(500./\text{temp})$                                                          | Tyndall et al. (2001)      |
| G4315 | TrGC   | $\text{CH}_3\text{COCH}_2\text{O}_2\text{H} + \text{OH} \rightarrow .3 \text{CH}_3\text{COCH}_2\text{O}_2 + .7 \text{MGLYOX} + .7 \text{OH}$                                                                                                            | $\text{k\_CH300H\_OH}$                                                                                 | see note                   |
| G4316 | TrGC   | $\text{CH}_3\text{COCH}_2\text{OH} + \text{OH} \rightarrow \text{MGLYOX} + \text{HO}_2$                                                                                                                                                                 | $2.15\text{E-}12*\text{EXP}(305./\text{temp})$                                                         | Dillon et al. (2006)       |
| G4317 | TrGC   | $\text{MGLYOX} + \text{OH} \rightarrow \text{CH}_3\text{C}(\text{O})\text{OO} + \text{CO}$                                                                                                                                                              | $8.4\text{E-}13*\text{EXP}(830./\text{temp})$                                                          | Tyndall et al. (1995)      |
| G4318 | TrGNC  | $\text{MPAN} + \text{OH} \rightarrow \text{CH}_3\text{COCH}_2\text{OH} + \text{NO}_2$                                                                                                                                                                   | $3.2\text{E-}11$                                                                                       | Orlando et al. (2002)      |
| G4319 | TrGNC  | $\text{MPAN} \rightarrow \text{MVKO2} + \text{NO}_2$                                                                                                                                                                                                    | $\text{k\_PAN\_M}$                                                                                     | see note                   |
| G4320 | TrGNC  | $\text{iC}_3\text{H}_7\text{ONO}_2 + \text{OH} \rightarrow \text{CH}_3\text{COCH}_3 + \text{NO}_2$                                                                                                                                                      | $6.2\text{E-}13*\text{EXP}(-230./\text{temp})$                                                         | Atkinson et al. (1999)     |
| G4400 | TrGC   | $\text{nC}_4\text{H}_{10} + \text{OH} \rightarrow \text{LC}_4\text{H}_9\text{O}_2 + \text{H}_2\text{O}$                                                                                                                                                 | $1.81\text{E-}17*\text{temp}*\text{temp}*\text{EXP}(114./\text{temp})$                                 | Atkinson (2003)            |
| G4401 | TrGC   | $\text{LC}_4\text{H}_9\text{O}_2 + \text{CH}_3\text{O}_2 \rightarrow .88 \text{MEK} + .68 \text{HCHO} + 1.23 \text{HO}_2 + .12 \text{CH}_3\text{CHO} + .12 \text{C}_2\text{H}_5\text{O}_2 + .18 \text{CH}_3\text{OH}$                                   | $\text{k\_PrO2\_CH302}$                                                                                | see note                   |
| G4402 | TrGC   | $\text{LC}_4\text{H}_9\text{O}_2 + \text{HO}_2 \rightarrow \text{LC}_4\text{H}_9\text{OOH}$                                                                                                                                                             | $\text{k\_PrO2\_HO2}$                                                                                  | see note                   |
| G4403 | TrGNC  | $\text{LC}_4\text{H}_9\text{O}_2 + \text{NO} \rightarrow \text{ProdRO2} + 1. \text{ProdO3} + .84 \text{NO}_2 + .56 \text{MEK} + .56 \text{HO}_2 + .28 \text{C}_2\text{H}_5\text{O}_2 + .28 \text{CH}_3\text{CHO} + .16 \text{LC}_4\text{H}_9\text{NO3}$ | $\text{k\_PrO2\_NO}$                                                                                   | see note                   |
| G4404 | TrGC   | $\text{LC}_4\text{H}_9\text{OOH} + \text{OH} \rightarrow .15 \text{LC}_4\text{H}_9\text{O}_2 + .85 \text{MEK} + .85 \text{OH} + .85 \text{H}_2\text{O}$                                                                                                 | $\text{k\_CH300H\_OH}$                                                                                 | see note                   |
| G4405 | TrGC   | $\text{MVK} + \text{O}_3 \rightarrow \text{LossO3R} + 1. \text{LossO3} + .45 \text{HCOOH} + .9 \text{MGLYOX} + .1 \text{CH}_3\text{C}(\text{O})\text{OO} + .19 \text{OH} + .22 \text{CO} + .32 \text{HO}_2$                                             | $.5*(1.36\text{E-}15*\text{EXP}(-2112./\text{temp}) + 7.51\text{E-}16*\text{EXP}(-1521./\text{temp}))$ | Pöschl et al. (2000)       |
| G4406 | TrGC   | $\text{MVK} + \text{OH} \rightarrow \text{MVKO2}$                                                                                                                                                                                                       | $.5*(4.1\text{E-}12*\text{EXP}(452./\text{temp}) + 1.9\text{E-}11*\text{EXP}(175./\text{temp}))$       | Pöschl et al. (2000)       |
| G4407 | TrGC   | $\text{MVKO2} + \text{HO}_2 \rightarrow \text{MVKOOH}$                                                                                                                                                                                                  | $1.82\text{E-}13*\text{EXP}(1300./\text{temp})$                                                        | Pöschl et al. (2000)       |
| G4408 | TrGNC  | $\text{MVKO2} + \text{NO} \rightarrow \text{ProdRO2} + 1. \text{ProdO3} + \text{NO}_2 + .25 \text{CH}_3\text{C}(\text{O})\text{OO} + .25 \text{CH}_3\text{COCH}_2\text{OH} + .75 \text{HCHO} + .25 \text{CO} + .75 \text{HO}_2 + .5 \text{MGLYOX}$      | $2.54\text{E-}12*\text{EXP}(360./\text{temp})$                                                         | Pöschl et al. (2000)       |
| G4409 | TrGNC  | $\text{MVKO2} + \text{NO}_2 \rightarrow \text{MPAN}$                                                                                                                                                                                                    | $.25*\text{k\_3rd}(\text{temp}, \text{cair}, 9.7\text{E-}29, 5.6, 9.3\text{E-}12, 1.5, 0.6)$           | Pöschl et al. (2000)*      |

Table 1: Gas phase reactions (... continued)

| #      | labels    | reaction                                                                                                                                                                                                                                                      | rate coefficient                     | reference                                     |
|--------|-----------|---------------------------------------------------------------------------------------------------------------------------------------------------------------------------------------------------------------------------------------------------------------|--------------------------------------|-----------------------------------------------|
| G4410  | TrGC      | MVKO2 + CH <sub>3</sub> O <sub>2</sub> → .5 MGLYOX + .375 CH <sub>3</sub> COCH <sub>2</sub> OH + .125 CH <sub>3</sub> C(O)OO + 1.125 HCHO + .875 HO <sub>2</sub> + .125 CO + .25 CH <sub>3</sub> OH                                                           | 2.E-12                               | von Kuhlmann (2001)                           |
| G4411  | TrGC      | MVKO2 + MVKO2 → CH <sub>3</sub> COCH <sub>2</sub> OH + MGLYOX + .5 CO + .5 HCHO + HO <sub>2</sub>                                                                                                                                                             | 2.E-12                               | Pöschl et al. (2000)                          |
| G4412  | TrGC      | MVKOOH + OH → MVKO2                                                                                                                                                                                                                                           | 3.E-11                               | Pöschl et al. (2000)                          |
| G4413  | TrGC      | MEK + OH → LMEKO2                                                                                                                                                                                                                                             | 1.3E-12*EXP(-25./temp)               | Atkinson et al. (1999)                        |
| G4414  | TrGC      | LMEKO2 + HO <sub>2</sub> → LMEKOOH                                                                                                                                                                                                                            | k_PrO2_HO2                           | see note                                      |
| G4415  | TrGNC     | LMEKO2 + NO → ProdRO2 + 1. ProdO3 + .985 CH <sub>3</sub> CHO + .985 CH <sub>3</sub> C(O)OO + .985 NO <sub>2</sub> + .015 LC4H9NO3                                                                                                                             | k_PrO2_NO                            | see note                                      |
| G4416  | TrGC      | LMEKOOH + OH → .8 BIACET + .8 OH + .2 LMEKO2                                                                                                                                                                                                                  | k_CH300H_OH                          | see note                                      |
| G4417  | TrGNC     | LC4H9NO3 + OH → MEK + NO <sub>2</sub> + H <sub>2</sub> O                                                                                                                                                                                                      | 1.7E-12                              | Atkinson et al. (1999)*                       |
| G4500  | TrGC      | C <sub>5</sub> H <sub>8</sub> + O <sub>3</sub> → LossO3R + 1. LossO3 + .28 HCOOH + .65 MVK + .1 MVKO2 + .1 CH <sub>3</sub> C(O)OO + .14 CO + .58 HCHO + .09 H <sub>2</sub> O <sub>2</sub> + .08 CH <sub>3</sub> O <sub>2</sub> + .25 OH + .25 HO <sub>2</sub> | 7.86E-15*EXP(-1913./temp)            | Pöschl et al. (2000)                          |
| G4501  | TrGC      | C <sub>5</sub> H <sub>8</sub> + OH → ISO2                                                                                                                                                                                                                     | 2.54E-11*EXP(410./temp)              | Pöschl et al. (2000)                          |
| G4502  | TrGNC     | C <sub>5</sub> H <sub>8</sub> + NO <sub>3</sub> → 1. LossO3 + ISON                                                                                                                                                                                            | 3.03E-12*EXP(-446./temp)             | Pöschl et al. (2000)                          |
| G4503  | TrGC      | ISO2 + HO <sub>2</sub> → ISOOH                                                                                                                                                                                                                                | 2.22E-13*EXP(1300./temp)             | Boyd et al. (2003)*                           |
| G4504a | TrGNC     | ISO2 + NO → ProdRO2 + 1. ProdO3 + .956 NO <sub>2</sub> + .956 MVK + .956 HCHO + .956 HO <sub>2</sub> + .044 ISON                                                                                                                                              | 2.54E-12*EXP(360./temp)              | Pöschl et al. (2000)*                         |
| G4505  | TrGC      | ISO2 + CH <sub>3</sub> O <sub>2</sub> → .5 MVK + 1.25 HCHO + HO <sub>2</sub> + .25 MGLYOX + .25 CH <sub>3</sub> COCH <sub>2</sub> OH + .25 CH <sub>3</sub> OH                                                                                                 | 2.E-12                               | von Kuhlmann (2001)                           |
| G4506  | TrGC      | ISO2 + ISO2 → 2 MVK + HCHO + HO <sub>2</sub>                                                                                                                                                                                                                  | 2.E-12                               | Pöschl et al. (2000)                          |
| G4507  | TrGC      | ISOOH + OH → MVK + OH                                                                                                                                                                                                                                         | 1.E-10                               | Pöschl et al. (2000)                          |
| G4508  | TrGNC     | ISON + OH → CH <sub>3</sub> COCH <sub>2</sub> OH + NACA                                                                                                                                                                                                       | 1.3E-11                              | Pöschl et al. (2000)                          |
| G6100  | UpStTrGCl | Cl + O <sub>3</sub> → ClO + O <sub>2</sub>                                                                                                                                                                                                                    | 2.8E-11*EXP(-250./temp)              | Atkinson et al. (2007)                        |
| G6101  | UpStGCl   | ClO + O( <sup>3</sup> P) → 2.0 LossO3Cl + 2. LossO3 + Cl + O <sub>2</sub>                                                                                                                                                                                     | 2.5E-11*EXP(110./temp)               | Atkinson et al. (2007)                        |
| G6102a | StTrGCl   | ClO + ClO → 2. LossO3 + Cl <sub>2</sub> + O <sub>2</sub>                                                                                                                                                                                                      | 1.0E-12*EXP(-1590./temp)             | Atkinson et al. (2007)                        |
| G6102b | StTrGCl   | ClO + ClO → 2. LossO3 + 2 Cl + O <sub>2</sub>                                                                                                                                                                                                                 | 3.0E-11*EXP(-2450./temp)             | Atkinson et al. (2007)                        |
| G6102c | StTrGCl   | ClO + ClO → 1. LossO3 + Cl + OCIO                                                                                                                                                                                                                             | 3.5E-13*EXP(-1370./temp)             | Atkinson et al. (2007)                        |
| G6102d | StTrGCl   | ClO + ClO → Cl <sub>2</sub> O <sub>2</sub>                                                                                                                                                                                                                    | k_ClO_ClO                            | Atkinson et al. (2007)                        |
| G6103  | StTrGCl   | Cl <sub>2</sub> O <sub>2</sub> → ClO + ClO                                                                                                                                                                                                                    | k_ClO_ClO/(1.72E-27*EXP(8649./temp)) | Atkinson et al. (2007), Sander et al. (2011)* |
| G6200  | StGCl     | Cl + H <sub>2</sub> → HCl + H                                                                                                                                                                                                                                 | 3.9E-11*EXP(-2310./temp)             | Atkinson et al. (2007)                        |

Table 1: Gas phase reactions (... continued)

| #      | labels     | reaction                                                                                                                                            | rate coefficient                                                                                       | reference                 |
|--------|------------|-----------------------------------------------------------------------------------------------------------------------------------------------------|--------------------------------------------------------------------------------------------------------|---------------------------|
| G6201a | StGCl      | $\text{Cl} + \text{HO}_2 \rightarrow \text{HCl} + \text{O}_2$                                                                                       | $4.4\text{E-}11\text{--}7.5\text{E-}11*\text{EXP}(-620./\text{temp})$                                  | Atkinson et al. (2007)    |
| G6201b | StGCl      | $\text{Cl} + \text{HO}_2 \rightarrow \text{LossO3Cl} + 1. \text{ProdO3} + \text{ClO} + \text{OH}$                                                   | $7.5\text{E-}11*\text{EXP}(-620./\text{temp})$                                                         | Atkinson et al. (2007)    |
| G6202  | StTrGCl    | $\text{Cl} + \text{H}_2\text{O}_2 \rightarrow \text{HCl} + \text{HO}_2$                                                                             | $1.1\text{E-}11*\text{EXP}(-980./\text{temp})$                                                         | Atkinson et al. (2007)    |
| G6203  | StGCl      | $\text{ClO} + \text{OH} \rightarrow \text{LossO3Cl} + 1. \text{LossO3} + .94 \text{Cl} + .94 \text{HO}_2$<br>$+ .06 \text{HCl} + .06 \text{O}_2$    | $7.3\text{E-}12*\text{EXP}(300./\text{temp})$                                                          | Atkinson et al. (2007)    |
| G6204  | StTrGCl    | $\text{ClO} + \text{HO}_2 \rightarrow \text{HOCl} + \text{O}_2$                                                                                     | $2.2\text{E-}12*\text{EXP}(340./\text{temp})$                                                          | Atkinson et al. (2007)    |
| G6205  | StTrGCl    | $\text{HCl} + \text{OH} \rightarrow \text{Cl} + \text{H}_2\text{O}$                                                                                 | $1.7\text{E-}12*\text{EXP}(-230./\text{temp})$                                                         | Atkinson et al. (2007)    |
| G6206  | StGCl      | $\text{HOCl} + \text{OH} \rightarrow \text{ClO} + \text{H}_2\text{O}$                                                                               | $3.0\text{E-}12*\text{EXP}(-500./\text{temp})$                                                         | Sander et al. (2011)      |
| G6300  | UpStTrGNCl | $\text{ClO} + \text{NO} \rightarrow 1.0 \text{LossO3Cl} + \text{LossO3Nn} + \text{NO}_2 + \text{Cl}$                                                | $6.2\text{E-}12*\text{EXP}(295./\text{temp})$                                                          | Atkinson et al. (2007)    |
| G6301  | StTrGNCl   | $\text{ClO} + \text{NO}_2 \rightarrow \text{ClNO}_3$                                                                                                | $k_{3\text{rd\_iupac}}(\text{temp}, \text{cair}, 1.6\text{E-}31, 3.4,$<br>$7.5\text{E-}11, 0., 0.4)$   | Atkinson et al. (2007)    |
| G6302  | TrGNCl     | $\text{ClNO}_3 \rightarrow \text{ClO} + \text{NO}_2$                                                                                                | $6.918\text{E-}7*\text{exp}(-10909./\text{temp})*\text{cair}$                                          | Anderson and Fahey (1990) |
| G6303  | StGNCl     | $\text{ClNO}_3 + \text{O}(^3\text{P}) \rightarrow \text{ClO} + \text{NO}_3$                                                                         | $4.5\text{E-}12*\text{EXP}(-900./\text{temp})$                                                         | Atkinson et al. (2007)    |
| G6304  | StTrGNCl   | $\text{ClNO}_3 + \text{Cl} \rightarrow \text{Cl}_2 + \text{NO}_3$                                                                                   | $6.2\text{E-}12*\text{EXP}(145./\text{temp})$                                                          | Atkinson et al. (2007)    |
| G6400  | StTrGCl    | $\text{Cl} + \text{CH}_4 \rightarrow \text{HCl} + \text{CH}_3\text{O}_2$                                                                            | $6.6\text{E-}12*\text{EXP}(-1240./\text{temp})$                                                        | Atkinson et al. (2006)    |
| G6401  | StTrGCl    | $\text{Cl} + \text{HCHO} \rightarrow \text{HCl} + \text{CO} + \text{HO}_2$                                                                          | $8.1\text{E-}11*\text{EXP}(-34./\text{temp})$                                                          | Atkinson et al. (2006)    |
| G6402  | StTrGCl    | $\text{Cl} + \text{CH}_3\text{OOH} \rightarrow \text{HCHO} + \text{HCl} + \text{OH}$                                                                | $5.9\text{E-}11$                                                                                       | Atkinson et al. (2006)*   |
| G6403  | StTrGCl    | $\text{ClO} + \text{CH}_3\text{O}_2 \rightarrow \text{LossO3Cl} + 1. \text{LossO3} + \text{HO}_2 + \text{Cl} +$<br>$\text{HCHO}$                    | $3.3\text{E-}12*\text{EXP}(-115./\text{temp})$                                                         | Sander et al. (2011)      |
| G6404  | StGCl      | $\text{CCl}_4 + \text{O}(^1\text{D}) \rightarrow 3.0 \text{ProdLCl} + \text{ClO} + 3 \text{Cl}$                                                     | $3.3\text{E-}10$                                                                                       | Sander et al. (2011)      |
| G6405  | StGCl      | $\text{CH}_3\text{Cl} + \text{O}(^1\text{D}) \rightarrow 1.0 \text{ProdLCl} + \text{LossO3Cl} + 1. \text{LossO3}$<br>$+ \text{OH} + \text{Cl}$      | $1.65\text{E-}10$                                                                                      | see note                  |
| G6406  | StGCl      | $\text{CH}_3\text{Cl} + \text{OH} \rightarrow 1.0 \text{ProdLCl} + \text{H}_2\text{O} + \text{Cl}$                                                  | $2.4\text{E-}12*\text{EXP}(-1250./\text{temp})$                                                        | Sander et al. (2011)      |
| G6407  | StGCCl     | $\text{CH}_3\text{CCl}_3 + \text{O}(^1\text{D}) \rightarrow 3.0 \text{ProdLCl} + \text{LossO3Cl} + 1. \text{LossO3}$<br>$+ \text{OH} + 3 \text{Cl}$ | $3.\text{E-}10$                                                                                        | see note                  |
| G6408  | StTrGCCl   | $\text{CH}_3\text{CCl}_3 + \text{OH} \rightarrow 3.0 \text{ProdLCl} + \text{H}_2\text{O} + 3 \text{Cl}$                                             | $1.64\text{E-}12*\text{EXP}(-1520./\text{temp})$                                                       | Sander et al. (2011)      |
| G6409  | TrGCCl     | $\text{Cl} + \text{C}_2\text{H}_4 \rightarrow .6666667 \text{CH}_3\text{CH}(\text{O}_2)\text{CH}_2\text{OH} + \text{HCl}$                           | $k_{3\text{rd\_iupac}}(\text{temp}, \text{cair}, 1.85\text{E-}29, 3.3,$<br>$6.0\text{E-}10, 0.0, 0.4)$ | Atkinson et al. (2006)*   |
| G6410  | TrGCCl     | $\text{Cl} + \text{CH}_3\text{CHO} \rightarrow \text{HCl} + \text{CH}_3\text{C}(\text{O})\text{OO}$                                                 | $8.0\text{e-}11$                                                                                       | Atkinson et al. (2006)    |
| G6500  | StGFCl     | $\text{CF}_2\text{Cl}_2 + \text{O}(^1\text{D}) \rightarrow 1.0 \text{ProdLCl} + \text{ClO} + \text{Cl}$                                             | $1.4\text{E-}10$                                                                                       | Sander et al. (2011)      |
| G6501  | StGFCl     | $\text{CFCl}_3 + \text{O}(^1\text{D}) \rightarrow 2.0 \text{ProdLCl} + \text{ClO} + 2 \text{Cl}$                                                    | $2.3\text{E-}10$                                                                                       | Sander et al. (2011)      |
| G7100  | StTrGBr    | $\text{Br} + \text{O}_3 \rightarrow \text{BrO} + \text{O}_2$                                                                                        | $1.7\text{E-}11*\text{EXP}(-800./\text{temp})$                                                         | Atkinson et al. (2007)    |
| G7101  | StGBr      | $\text{BrO} + \text{O}(^3\text{P}) \rightarrow 2.0 \text{LossO3Br} + 2. \text{LossO3} + \text{Br} + \text{O}_2$                                     | $1.9\text{E-}11*\text{EXP}(230./\text{temp})$                                                          | Atkinson et al. (2007)    |
| G7102a | StTrGBr    | $\text{BrO} + \text{BrO} \rightarrow 2.0 \text{LossO3Br} + 2. \text{LossO3} + 2 \text{Br} + \text{O}_2$                                             | $2.7\text{E-}12$                                                                                       | Atkinson et al. (2007)    |
| G7102b | StTrGBr    | $\text{BrO} + \text{BrO} \rightarrow 2.0 \text{LossO3Br} + 2. \text{LossO3} + \text{Br}_2 + \text{O}_2$                                             | $2.9\text{E-}14*\text{EXP}(840./\text{temp})$                                                          | Atkinson et al. (2007)    |

Table 1: Gas phase reactions (... continued)

| #      | labels    | reaction                                                                                                                         | rate coefficient                                                                                                                                                             | reference                                              |
|--------|-----------|----------------------------------------------------------------------------------------------------------------------------------|------------------------------------------------------------------------------------------------------------------------------------------------------------------------------|--------------------------------------------------------|
| G7200  | StTrGBr   | $\text{Br} + \text{HO}_2 \rightarrow \text{HBr} + \text{O}_2$                                                                    | $7.7\text{E-}12 \cdot \text{EXP}(-450./\text{temp})$                                                                                                                         | Atkinson et al. (2007)                                 |
| G7201  | StTrGBr   | $\text{BrO} + \text{HO}_2 \rightarrow \text{HOBr} + \text{O}_2$                                                                  | $4.5\text{E-}12 \cdot \text{EXP}(500./\text{temp})$                                                                                                                          | Atkinson et al. (2007)                                 |
| G7202  | StTrGBr   | $\text{HBr} + \text{OH} \rightarrow \text{Br} + \text{H}_2\text{O}$                                                              | $6.7\text{E-}12 \cdot \text{EXP}(155./\text{temp})$                                                                                                                          | Atkinson et al. (2007)                                 |
| G7203  | StGBr     | $\text{HOBr} + \text{O}(^3\text{P}) \rightarrow \text{LossO3Br} + 1. \text{ LossO3} + \text{OH} + \text{BrO}$                    | $1.2\text{E-}10 \cdot \text{EXP}(-430./\text{temp})$                                                                                                                         | Atkinson et al. (2007)                                 |
| G7204  | StTrGBr   | $\text{Br}_2 + \text{OH} \rightarrow 1. \text{ ProdO3} + \text{HOBr} + \text{Br}$                                                | $2.0\text{E-}11 \cdot \text{EXP}(240./\text{temp})$                                                                                                                          | Atkinson et al. (2007)                                 |
| G7300  | TrGNBr    | $\text{Br} + \text{BrNO}_3 \rightarrow \text{Br}_2 + \text{NO}_3$                                                                | $4.9\text{E-}11$                                                                                                                                                             | Orlando and Tyndall (1996)                             |
| G7301  | StTrGNBr  | $\text{BrO} + \text{NO} \rightarrow \text{LossO3Br} + \text{LossO3Nn} + \text{Br} + \text{NO}_2$                                 | $8.7\text{E-}12 \cdot \text{EXP}(260./\text{temp})$                                                                                                                          | Atkinson et al. (2007)                                 |
| G7302  | StTrGNBr  | $\text{BrO} + \text{NO}_2 \rightarrow \text{BrNO}_3$                                                                             | $k_{\text{BrO\_NO2}}$                                                                                                                                                        | Atkinson et al. (2007)*                                |
| G7303  | TrGNBr    | $\text{BrNO}_3 \rightarrow \text{BrO} + \text{NO}_2$                                                                             | $k_{\text{BrO\_NO2}} / (5.44\text{E-}9 \cdot \exp(14192./\text{temp}) \cdot 1.\text{E6} \cdot R_{\text{gas}} \cdot \text{temp} / (\text{atm}2\text{Pa} \cdot N_{\text{A}}))$ | Orlando and Tyndall (1996),<br>Atkinson et al. (2007)* |
| G7400  | StTrGBr   | $\text{Br} + \text{HCHO} \rightarrow \text{HBr} + \text{CO} + \text{HO}_2$                                                       | $7.7\text{E-}12 \cdot \text{EXP}(-580./\text{temp})$                                                                                                                         | Atkinson et al. (2006)                                 |
| G7401  | TrGBr     | $\text{Br} + \text{CH}_3\text{OOH} \rightarrow \text{CH}_3\text{O}_2 + \text{HBr}$                                               | $2.6\text{E-}12 \cdot \text{EXP}(-1600./\text{temp})$                                                                                                                        | Kondo and Benson (1984)                                |
| G7402a | TrGBr     | $\text{BrO} + \text{CH}_3\text{O}_2 \rightarrow \text{HOBr} + \text{HCHO}$                                                       | $\text{G7402a\_yield} \cdot 5.7\text{E-}12$                                                                                                                                  | Aranda et al. (1997)                                   |
| G7402b | TrGBr     | $\text{BrO} + \text{CH}_3\text{O}_2 \rightarrow \text{LossO3Br} + 1. \text{ LossO3} + \text{Br} + \text{HCHO} + \text{HO}_2$     | $(1.-\text{G7402a\_yield}) \cdot 5.7\text{E-}12$                                                                                                                             | Aranda et al. (1997)                                   |
| G7403  | StTrGBr   | $\text{CH}_3\text{Br} + \text{OH} \rightarrow 1.0 \text{ ProdLBr} + \text{H}_2\text{O} + \text{Br}$                              | $2.35\text{E-}12 \cdot \text{EXP}(-1300./\text{temp})$                                                                                                                       | Sander et al. (2011)                                   |
| G7404  | TrGCBBr   | $\text{Br} + \text{C}_2\text{H}_4 \rightarrow .6666667 \text{ CH}_3\text{CH}(\text{O}_2)\text{CH}_2\text{OH} + \text{HBr}$       | $2.8\text{E-}13 \cdot \text{EXP}(224./\text{temp}) / (1.+1.13\text{E}24 \cdot \text{EXP}(-3200./\text{temp}) / \text{C}(\text{ind\_02}))$                                    | Atkinson et al. (2006)*                                |
| G7405  | TrGCBBr   | $\text{Br} + \text{CH}_3\text{CHO} \rightarrow \text{HBr} + \text{CH}_3\text{C}(\text{O})\text{OO}$                              | $1.8\text{E-}11 \cdot \text{EXP}(-460./\text{temp})$                                                                                                                         | Atkinson et al. (2006)                                 |
| G7407  | TrGBr     | $\text{CHBr}_3 + \text{OH} \rightarrow 3.0 \text{ ProdSBr} + \text{H}_2\text{O} + 3 \text{ Br}$                                  | $1.35\text{E-}12 \cdot \text{EXP}(-600./\text{temp})$                                                                                                                        | Sander et al. (2011)*                                  |
| G7408  | TrGBr     | $\text{CH}_2\text{Br}_2 + \text{OH} \rightarrow 2.0 \text{ ProdSBr} + \text{H}_2\text{O} + 2 \text{ Br}$                         | $2.0\text{E-}12 \cdot \text{EXP}(-840./\text{temp})$                                                                                                                         | Sander et al. (2011)*                                  |
| G7600  | TrGClBr   | $\text{Br} + \text{BrCl} \rightarrow \text{Br}_2 + \text{Cl}$                                                                    | $3.32\text{E-}15$                                                                                                                                                            | Manion et al. (2010)                                   |
| G7601  | TrGClBr   | $\text{Br} + \text{Cl}_2 \rightarrow \text{BrCl} + \text{Cl}$                                                                    | $1.10\text{E-}15$                                                                                                                                                            | Dolson and Leone (1987)                                |
| G7602  | TrGClBr   | $\text{Br}_2 + \text{Cl} \rightarrow \text{BrCl} + \text{Br}$                                                                    | $2.3\text{E-}10 \cdot \text{EXP}(135./\text{temp})$                                                                                                                          | Bedjanian et al. (1998)                                |
| G7603a | StTrGClBr | $\text{BrO} + \text{ClO} \rightarrow 1. \text{ LossO3} + \text{Br} + \text{OClO}$                                                | $1.6\text{E-}12 \cdot \text{EXP}(430./\text{temp})$                                                                                                                          | Atkinson et al. (2007)                                 |
| G7603b | StTrGClBr | $\text{BrO} + \text{ClO} \rightarrow \text{LossO3Br} + \text{LossO3Cl} + 2. \text{ LossO3} + \text{Br} + \text{Cl} + \text{O}_2$ | $2.9\text{E-}12 \cdot \text{EXP}(220./\text{temp})$                                                                                                                          | Atkinson et al. (2007)                                 |
| G7603c | StTrGClBr | $\text{BrO} + \text{ClO} \rightarrow \text{LossO3Br} + \text{LossO3Cl} + 2. \text{ LossO3} + \text{BrCl} + \text{O}_2$           | $5.8\text{E-}13 \cdot \text{EXP}(170./\text{temp})$                                                                                                                          | Atkinson et al. (2007)                                 |
| G7604  | TrGClBr   | $\text{BrCl} + \text{Cl} \rightarrow \text{Br} + \text{Cl}_2$                                                                    | $1.45\text{E-}11$                                                                                                                                                            | Clyne and Cruse (1972)                                 |
| G7605  | TrGClBr   | $\text{CHCl}_2\text{Br} + \text{OH} \rightarrow 1.0 \text{ ProdSBr} + \text{H}_2\text{O} + \text{Br}$                            | $2.0\text{E-}12 \cdot \text{EXP}(-840./\text{temp})$                                                                                                                         | see note                                               |
| G7606  | TrGClBr   | $\text{CHClBr}_2 + \text{OH} \rightarrow 2.0 \text{ ProdSBr} + \text{H}_2\text{O} + 2 \text{ Br}$                                | $2.0\text{E-}12 \cdot \text{EXP}(-840./\text{temp})$                                                                                                                         | see note                                               |
| G7607  | TrGClBr   | $\text{CH}_2\text{ClBr} + \text{OH} \rightarrow 1.0 \text{ ProdSBr} + \text{H}_2\text{O} + \text{Br}$                            | $2.4\text{E-}12 \cdot \text{EXP}(-920./\text{temp})$                                                                                                                         | Sander et al. (2011)*                                  |
| G9200  | StTrGS    | $\text{SO}_2 + \text{OH} \rightarrow 1. \text{ LossO3} + \text{H}_2\text{SO}_4 + \text{HO}_2$                                    | $k_{\text{3rd}}(\text{temp}, \text{cair}, 3.3\text{E-}31, 4.3, 1.6\text{E-}12, 0., 0.6)$                                                                                     | Sander et al. (2011)                                   |

Table 1: Gas phase reactions (... continued)

| #         | labels   | reaction                                                                                                                                                                    | rate coefficient                                 | reference               |
|-----------|----------|-----------------------------------------------------------------------------------------------------------------------------------------------------------------------------|--------------------------------------------------|-------------------------|
| G9400a    | TrGS     | $\text{DMS} + \text{OH} \rightarrow \text{CH}_3\text{SO}_2 + \text{HCHO}$                                                                                                   | $1.13\text{E-}11*\text{EXP}(-253./\text{temp})$  | Atkinson et al. (2004)* |
| G9400b    | TrGS     | $\text{DMS} + \text{OH} \rightarrow \text{DMSO} + \text{HO}_2$                                                                                                              | $k_{\text{DMS\_OH}}$                             | Atkinson et al. (2004)* |
| G9401     | TrGNS    | $\text{DMS} + \text{NO}_3 \rightarrow 1. \text{ LossO3} + \text{CH}_3\text{SO}_2 + \text{HNO}_3 + \text{HCHO}$                                                              | $1.9\text{E-}13*\text{EXP}(520./\text{temp})$    | Atkinson et al. (2004)  |
| G9402     | TrGS     | $\text{DMSO} + \text{OH} \rightarrow 0.6 \text{ ProdO3} + .6 \text{ SO}_2 + \text{HCHO} + .6 \text{ CH}_3\text{O}_2 + .4 \text{ HO}_2 + .4 \text{ CH}_3\text{SO}_3\text{H}$ | $1.\text{E-}10$                                  | Hynes and Wine (1996)   |
| G9403     | TrGS     | $\text{CH}_3\text{SO}_2 \rightarrow 1. \text{ ProdO3} + \text{SO}_2 + \text{CH}_3\text{O}_2$                                                                                | $1.8\text{E}13*\text{EXP}(-8661./\text{temp})$   | Barone et al. (1995)    |
| G9404     | TrGS     | $\text{CH}_3\text{SO}_2 + \text{O}_3 \rightarrow 1. \text{ LossO3} + \text{CH}_3\text{SO}_3$                                                                                | $3.\text{E-}13$                                  | Barone et al. (1995)    |
| G9405     | TrGS     | $\text{CH}_3\text{SO}_3 + \text{HO}_2 \rightarrow \text{CH}_3\text{SO}_3\text{H}$                                                                                           | $5.\text{E-}11$                                  | Barone et al. (1995)    |
| G9600     | TrGSCl   | $\text{DMS} + \text{Cl} \rightarrow \text{CH}_3\text{SO}_2 + \text{HCl} + \text{HCHO}$                                                                                      | $3.3\text{E-}10$                                 | Atkinson et al. (2004)  |
| G9700     | TrGSBr   | $\text{DMS} + \text{Br} \rightarrow \text{CH}_3\text{SO}_2 + \text{HBr} + \text{HCHO}$                                                                                      | $9.\text{E-}11*\text{EXP}(-2386./\text{temp})$   | Jefferson et al. (1994) |
| G9701     | TrGSBr   | $\text{DMS} + \text{BrO} \rightarrow 1. \text{ LossO3} + \text{DMSO} + \text{Br}$                                                                                           | $4.4\text{E-}13$                                 | Ingham et al. (1999)    |
| G01Diag   | StTrG    | $\text{O}_3(\text{s}) \rightarrow \text{LO}_3(\text{s})$                                                                                                                    | $k_{\text{O3s}}$                                 | ?*                      |
| G10G6501  | StGFCl   | $(\text{CFCl}_3)_c + \text{O}(^1\text{D}) \rightarrow \text{O}(^1\text{D})$                                                                                                 | $2.3\text{E-}10$                                 | Sander et al. (2011)    |
| G12G6500  | StGFCl   | $(\text{CF}_2\text{Cl}_2)_c + \text{O}(^1\text{D}) \rightarrow \text{O}(^1\text{D})$                                                                                        | $1.4\text{E-}10$                                 | Sander et al. (2011)    |
| G14G3102a | UpStGN   | $(\text{N}_2\text{O})_c + \text{O}(^1\text{D}) \rightarrow \text{O}(^1\text{D})$                                                                                            | $7.25\text{E-}11*\text{EXP}(20./\text{temp})$    | Sander et al. (2011)    |
| G15G3102b | StGN     | $(\text{N}_2\text{O})_c + \text{O}(^1\text{D}) \rightarrow \text{O}(^1\text{D}) + \dots$                                                                                    | $4.63\text{E-}11*\text{EXP}(20./\text{temp})$    | Sander et al. (2011)    |
| G17G6407  | StGCCl   | $(\text{CH}_3\text{CCl}_3)_c + \text{O}(^1\text{D}) \rightarrow \text{O}(^1\text{D})$                                                                                       | $3.\text{E-}10$                                  | see note                |
| G18G6408  | StTrGCCl | $(\text{CH}_3\text{CCl}_3)_c + \text{OH} \rightarrow \text{OH}$                                                                                                             | $1.64\text{E-}12*\text{EXP}(-1520./\text{temp})$ | Sander et al. (2011)    |

\*Notes:

Rate coefficients for three-body reactions are defined via the function `k_3rd(T, M, k0300, n, kinf300, m, fc)`. In the code, the temperature  $T$  is called `temp` and the concentration of “air molecules”  $M$  is called `cair`. Using the auxiliary variables  $k_0(T)$ ,  $k_{\text{inf}}(T)$ , and  $k_{\text{ratio}}$ , `k_3rd` is defined as:

$$k_0(T) = k_0^{300} \times \left(\frac{300\text{K}}{T}\right)^n \quad (1)$$

$$k_{\text{inf}}(T) = k_{\text{inf}}^{300} \times \left(\frac{300\text{K}}{T}\right)^m \quad (2)$$

$$k_{\text{ratio}} = \frac{k_0(T)M}{k_{\text{inf}}(T)} \quad (3)$$

$$\text{k\_3rd} = \frac{k_0(T)M}{1 + k_{\text{ratio}}} \times f_c^{\left(\frac{1}{1 + (\log_{10}(k_{\text{ratio}}))^2}\right)} \quad (4)$$

A similar function, called `k_3rd_iupac` here, is used by Atkinson et al. (2005) for three-body reactions. It has the same function parameters as `k_3rd` and it is defined as:

$$k_0(T) = k_0^{300} \times \left(\frac{300\text{K}}{T}\right)^n \quad (5)$$

$$k_{\text{inf}}(T) = k_{\text{inf}}^{300} \times \left(\frac{300\text{K}}{T}\right)^m \quad (6)$$

$$k_{\text{ratio}} = \frac{k_0(T)M}{k_{\text{inf}}(T)} \quad (7)$$

$$N = 0.75 - 1.27 \times \log_{10}(f_c) \quad (8)$$

$$\text{k\_3rd\_iupac} = \frac{k_0(T)M}{1 + k_{\text{ratio}}} \times f_c^{\left(\frac{1}{1 + (\log_{10}(k_{\text{ratio}})/N)^2}\right)} \quad (9)$$

G1002: The path leading to  $2 \text{ O}(^3\text{P}) + \text{O}_2$  results in a null cycle regarding odd oxygen and is neglected.

G2110: The rate coefficient is: `k_H02_H02 = (1.5E-12*EXP(19./temp)+1.7E-33*EXP(1000./temp)`

`*cair)* (1.+1.4E-21*EXP(2200./temp)*C(ind_H20))`. The value for the first (pressure-independent) part is from Christensen et al. (2002), the water term from Kircher and Sander (1984).

G3109: The rate coefficient is: `k_N03_N02 = k_3rd(temp,cair,2.E-30,4.4,1.4E-12,0.7,0.6)`.

G3110: The rate coefficient is defined as backward reaction divided by equilibrium constant.

G3203: The rate coefficient is: `k_N02_H02 = k_3rd(temp,cair,1.8E-31,3.2,4.7E-12,1.4,0.6)`.

G3206: The rate coefficient is: `k_HN03_OH = 2.4E-14 * EXP(460./temp) + 1./ ( 1./ (6.5E-34 * EXP(1335./temp)*cair) + 1./ (2.7E-17 * EXP(2199./temp)) )`

G3207: The rate coefficient is defined as backward reaction divided by equilibrium constant.

G4103: Sander et al. (2006) recommend a zero product yield for HCHO.

G4107: The rate coefficient is: `k_CH300H_OH = 3.8E-12*EXP(200./temp)`.

G4109: The same temperature dependence assumed as for  $\text{CH}_3\text{CHO} + \text{NO}_3$ . At 298 K,  $k = 5.8 \times 10^{-16}$ .

G4201: The product distribution is from Rickard and Pascoe (2009), after substitution of the Criegee intermediate by its decomposition products.

G4206: The product  $\text{C}_2\text{H}_5\text{OH}$ , which reacts only with OH, is substituted by its degradation products  $\approx 0.1 \text{ HOCH}_2\text{CH}_2\text{O}_2 + 0.9 \text{ CH}_3\text{CHO} + 0.9 \text{ HO}_2$ .

G4207: The rate constant  $8.01\text{E-}12$  is for the H abstraction in alpha to the  $-\text{OOH}$  group (Rickard and Pascoe, 2009) and  $0.6 * k_{\text{CH300H\_OH}}$  is for the  $\text{C}_2\text{H}_5\text{O}_2$  channel. The branching ratios are calculated from the terms of the rate coefficient at 298 K.

G4218: The rate coefficient is the same as for the  $\text{CH}_3\text{O}_2$  channel in G4107 ( $\text{CH}_3\text{OOH} + \text{OH}$ ).

G4221: The rate coefficient  $\text{isk\_PAN\_M} = k_{\text{CH3CO3\_N02}}/9.\text{E-}29 * \text{EXP}(-14000./\text{temp})$ , i.e. the rate coefficient is defined as backward reaction divided by equilibrium constant.

G4301: The product distribution is for terminal olefin carbons from Zaveri and Peters (1999).

G4304: The value for the generic  $\text{RO}_2 + \text{HO}_2$  reaction from Atkinson (1997) is used here.

G4307: Analogous to G4207 for both rate coefficient and branching ratios.

G4401:  $\text{NC4H9O}$  and  $\text{SC4H9O}$  are substituted with  $2 \text{ CO}_2 + \text{C}_2\text{H}_5\text{O}_2$  and  $0.636 \text{ MEK} + \text{HO}_2$  and  $0.364 \text{ CH}_3\text{CHO} + \text{C}_2\text{H}_5\text{O}_2$ , respectively. The stoichiometric coefficients on the right side are weighted averages.

G4403: The alkyl nitrate yield is the weighted average yield for the two isomers forming from  $\text{NC4H9O}_2$  and  $\text{SC4H9O}_2$ .

G4404: The product distribution is the weighted average of the single isomer hydroperoxides. It is calculated from the rate constants of single channels and the ratio of the isomers  $\text{NC4H9O}_2$  and  $\text{SC4H9O}_2$ . The overall rate constant for this reaction is calculated as weighted average of the channels rate constants. The relative weight of the products from  $\text{NC4H9OOH}$  and  $\text{SC4H9OOH}$  are then 0.0887 and 0.9113. The channels producing  $\text{RO}_2$  are given the rate coefficient  $0.6 * k_{\text{CH300H\_OH}}$  as for G4107. For  $\text{NC4H9OOH}$  the products are  $0.327 \text{ NC4H9O}_2 + 0.673 \text{ C3H7CHO} + 0.673 \text{ OH}$ .  $\text{C3H7CHO}$  is then substituted with  $2 \text{ CO}_2 + \text{C}_2\text{H}_5\text{O}_2$ . Hence,  $0.327 \text{ NC4H9O}_2 + 1.346 \text{ CO}_2 + 0.673 \text{ C}_2\text{H}_5\text{O}_2 + 0.673 \text{ OH}$ . For  $\text{SC4H9OOH}$  the products are  $0.219 \text{ SC4H9O}_2 + 0.781 \text{ MEK} + 0.781 \text{ OH}$ .

G4415: Alkyl nitrate formation is neglected. The products of  $\text{MEKAO}$  and  $\text{MEKCO}$  are substituted with  $\text{HCHO} + \text{CO}_2 + \text{HOCH}_2\text{CH}_2\text{O}_2$  and  $\text{HCHO} + \text{CO}_2 + \text{C}_2\text{H}_5\text{O}_2$ .

G4416: LMEKOOH is assumed having the composition  $0.459 \text{ MEKAOOH} + 0.462 \text{ MEKBOOH} + 0.079 \text{ MEKCOOH}$ .  $\text{MEKAOOH} + \text{OH}$  gives  $0.89 \text{ CO}_2\text{C}_3\text{CHO} + 0.89 \text{ OH} + 0.11 \text{ MEKAO}_2 + \text{H}_2\text{O}$ .  $\text{CO}_2\text{C}_3\text{CHO}$  is substituted with  $\text{CH}_3\text{COCH}_2\text{O}_2 + \text{CO}_2$  and the products become  $0.89 \text{ CH}_3\text{COCH}_2\text{O}_2 + 0.89 \text{ CO}_2 + 0.89 \text{ OH} + 0.11 \text{ MEKAO}_2 + \text{H}_2\text{O}$ .  $\text{MEKBOOH} + \text{OH}$  gives  $0.758 \text{ BIACET} + 0.758 \text{ OH} + 0.242 \text{ MEKBO}_2 + \text{H}_2\text{O}$ .  $\text{MEKCOOH} + \text{OH}$  gives  $0.614 \text{ EGLYOX} + 0.614 \text{ OH} + 0.386 \text{ MEKCO}_2 + \text{H}_2\text{O}$ .  $\text{EGLYOX}$  is substituted with  $\text{C}_2\text{H}_5\text{O}_2 + 2 \text{ CO}_2$  and the products become  $0.614 \text{ C}_2\text{H}_5\text{O}_2 + 1.228 \text{ CO}_2 + 0.614 \text{ OH} + 0.386 \text{ MEKCO}_2 + \text{H}_2\text{O}$ .

G4417: The rate coefficient is the combination of the ones for the two isomers weighted by the relative abundances for  $\text{NC}_4\text{H}_9\text{NO}_3$  and  $\text{SC}_4\text{H}_9\text{NO}_3$ , respectively. Product distribution is calculated accordingly.  $\text{NC}_4\text{H}_9\text{NO}_3 + \text{OH}$  gives  $\text{C}_3\text{H}_7\text{CHO} + \text{NO}_2 + \text{H}_2\text{O}$  with  $\text{C}_3\text{H}_7\text{CHO}$  being substituted with  $2 \text{ CO}_2 + \text{C}_2\text{H}_5\text{O}_2$ . After substitution is obtained  $2 \text{ CO}_2 + \text{C}_2\text{H}_5\text{O}_2 + \text{NO}_2 + \text{H}_2\text{O}$ .  $\text{SC}_4\text{H}_9\text{NO}_3 + \text{OH}$  gives  $\text{MEK} + \text{NO}_2 + \text{H}_2\text{O}$ . For the product distribution  $\text{NC}_4\text{H}_9\text{NO}_3$  and

$\text{SC}_4\text{H}_9\text{NO}_3$  account for 0.08577 and 0.91423, respectively.

G6103: The rate coefficient is defined as backward reaction divided by equilibrium constant.

G6402: The initial products are probably  $\text{HCl}$  and  $\text{CH}_2\text{OOH}$  (Atkinson et al., 2006). It is assumed that  $\text{CH}_2\text{OOH}$  dissociates into  $\text{HCHO}$  and  $\text{OH}$ .

G6405: Average of reactions with  $\text{CH}_3\text{Br}$  and  $\text{CH}_3\text{F}$  from Sander et al. (2006) (B. Steil, pers. comm.).

G6407: Rough extrapolation from reactions with  $\text{CH}_3\text{CF}_3$ ,  $\text{CH}_3\text{CClF}_2$ , and  $\text{CH}_3\text{CCl}_2\text{F}$  from Sander et al. (2006).

G6409: It is assumed that the reaction liberates all  $\text{Cl}$  atoms in the form of  $\text{HCl}$ .

G7302: The rate coefficient is:  $\text{k\_BrO\_NO}_2 = \text{k\_3rd}(\text{temp}, \text{cair}, 5.2\text{E-}31, 3.2, 6.9\text{E-}12, 2.9, 0.6)$ .

G7303: The rate coefficient is defined as backward reaction (Atkinson et al., 2007) divided by equilibrium constant (Orlando and Tyndall, 1996).

G7404: It is assumed that the reaction liberates all  $\text{Br}$  atoms in the form of  $\text{HBr}$ .

G7407: It is assumed that the reaction liberates all  $\text{Br}$  atoms. The fate of the carbon atom is currently not considered.

G7408: It is assumed that the reaction liberates all  $\text{Br}$  atoms. The fate of the carbon atom is currently not considered.

G7605: Same value as for G7408:  $\text{CH}_2\text{Br}_2 + \text{OH}$  assumed. It is assumed that the reaction liberates all  $\text{Br}$  atoms but not  $\text{Cl}$ . The fate of the carbon atom is currently not considered.

G7606: Same value as for G7408:  $\text{CH}_2\text{Br}_2 + \text{OH}$  assumed. It is assumed that the reaction liberates all  $\text{Br}$  atoms but not  $\text{Cl}$ . The fate of the carbon atom is currently not considered.

G7607: It is assumed that the reaction liberates all  $\text{Br}$  atoms but not  $\text{Cl}$ . The fate of the carbon atom is currently not considered.

G9400: Addition path. The rate coefficient is:  $\text{k\_DMS\_OH} = 1.0\text{E-}39 * \text{EXP}(5820./\text{temp}) * \text{C}(\text{ind\_O}_2) / (1 + 5.0\text{E-}30 * \text{EXP}(6280./\text{temp}) * \text{C}(\text{ind\_O}_2))$ .

Table 2: Photolysis reactions

| #      | labels    | reaction                                                                                     | rate coefficient  | reference            |
|--------|-----------|----------------------------------------------------------------------------------------------|-------------------|----------------------|
| J1000a | UpStTrGJ  | $O_2 + h\nu \rightarrow 2. \text{ProdO3} + O(^3P) + O(^3P)$                                  | jx(ip_02)         | see note             |
| J1001a | UpStTrGJ  | $O_3 + h\nu \rightarrow O(^1D) + O_2$                                                        | jx(ip_01D)        | see note             |
| J1001b | UpStTrGJ  | $O_3 + h\nu \rightarrow O(^3P) + O_2$                                                        | jx(ip_03P)        | see note             |
| J2100a | UpStGJ    | $H_2O + h\nu \rightarrow H + OH$                                                             | jx(ip_H20)        | see note             |
| J2101  | UpStTrGJ  | $H_2O_2 + h\nu \rightarrow 2 OH$                                                             | jx(ip_H202)       | see note             |
| J3100  | UpStGNJ   | $N_2O + h\nu \rightarrow 1. \text{ProdO3} + O(^1D) + N_2$                                    | jx(ip_N20)        | see note             |
| J3101  | UpStTrGNJ | $NO_2 + h\nu \rightarrow 1.0 \text{LossJ3101} + NO + O(^3P)$                                 | jx(ip_N02)        | see note             |
| J3102a | UpStGNJ   | $NO + h\nu \rightarrow 1. \text{ProdO3} + N + O(^3P)$                                        | jx(ip_N0)         | see note             |
| J3103a | UpStTrGNJ | $NO_3 + h\nu \rightarrow 1.0 \text{LossJ3103a} + NO_2 + O(^3P)$                              | jx(ip_N020)       | see note             |
| J3103b | UpStTrGNJ | $NO_3 + h\nu \rightarrow 2.0 \text{LossO3N} + 2. \text{LossO3} + NO + O_2$                   | jx(ip_N002)       | see note             |
| J3104  | StTrGNJ   | $N_2O_5 + h\nu \rightarrow NO_2 + NO_3$                                                      | jx(ip_N205)       | see note             |
| J3200  | TrGNJ     | $HONO + h\nu \rightarrow NO + OH$                                                            | jx(ip_HONO)       | see note             |
| J3201  | StTrGNJ   | $HNO_3 + h\nu \rightarrow NO_2 + OH$                                                         | jx(ip_HN03)       | see note             |
| J3202  | StTrGNJ   | $HNO_4 + h\nu \rightarrow 0.333 \text{ProdO3} + .667 NO_2 + .667 HO_2 + .333 NO_3 + .333 OH$ | jx(ip_HN04)       | see note             |
| J4100  | StTrGJ    | $CH_3OOH + h\nu \rightarrow HCHO + OH + HO_2$                                                | jx(ip_CH300H)     | see note             |
| J4101a | StTrGJ    | $HCHO + h\nu \rightarrow H_2 + CO$                                                           | jx(ip_COH2)       | see note             |
| J4101b | StTrGJ    | $HCHO + h\nu \rightarrow H + CO + HO_2$                                                      | jx(ip_CH0H)       | see note             |
| J4102  | StGJ      | $CO_2 + h\nu \rightarrow 1. \text{ProdO3} + CO + O(^3P)$                                     | jx(ip_CO2)        | see note             |
| J4103  | StGJ      | $CH_4 + h\nu \rightarrow CO + 0.31 H + 0.69 H_2 + 1.155 H_2O$                                | jx(ip_CH4)        | see note             |
| J4200  | TrGCJ     | $C_2H_5OOH + h\nu \rightarrow CH_3CHO + HO_2 + OH$                                           | jx(ip_CH300H)     | von Kuhlmann (2001)* |
| J4201  | TrGCJ     | $CH_3CHO + h\nu \rightarrow CH_3O_2 + HO_2 + CO$                                             | jx(ip_CH3CHO)     | see note             |
| J4202  | TrGCJ     | $CH_3C(O)OOH + h\nu \rightarrow CH_3O_2 + OH + CO_2$                                         | jx(ip_CH3C03H)    | see note             |
| J4203  | TrGNCJ    | $NACA + h\nu \rightarrow NO_2 + HCHO + CO$                                                   | 0.19*jx(ip_CH0H)  | see note             |
| J4204  | TrGNCJ    | $PAN + h\nu \rightarrow CH_3C(O)OO + NO_2$                                                   | jx(ip_PAN)        | see note             |
| J4300  | TrGCJ     | $iC_3H_7OOH + h\nu \rightarrow CH_3COCH_3 + HO_2 + OH$                                       | jx(ip_CH300H)     | von Kuhlmann (2001)* |
| J4301  | TrGCJ     | $CH_3COCH_3 + h\nu \rightarrow CH_3C(O)OO + CH_3O_2$                                         | jx(ip_CH3COCH3)   | see note             |
| J4302  | TrGCJ     | $CH_3COCH_2OH + h\nu \rightarrow CH_3C(O)OO + HCHO + HO_2$                                   | 0.074*jx(ip_CH0H) | see note             |
| J4303  | TrGCJ     | $MGLYOX + h\nu \rightarrow CH_3C(O)OO + CO + HO_2$                                           | jx(ip_MGLYOX)     | see note             |
| J4304  | TrGCJ     | $CH_3COCH_2O_2H + h\nu \rightarrow CH_3C(O)OO + HCHO + OH$                                   | jx(ip_CH300H)     | see note             |
| J4305  | TrGNCJ    | $MPAN + h\nu \rightarrow CH_3COCH_2OH + NO_2$                                                | jx(ip_PAN)        | see note             |
| J4306  | TrGNCJ    | $iC_3H_7ONO_2 + h\nu \rightarrow CH_3COCH_3 + NO_2 + HO_2$                                   | 3.7*jx(ip_PAN)    | see note             |
| J4400  | TrGCJ     | $LC_4H_9OOH + h\nu \rightarrow OH + .67 MEK + .67 HO_2 + .33 C_2H_5O_2 + .33 CH_3CHO$        | jx(ip_CH300H)     | see note             |

Table 2: Photolysis reactions (... continued)

| #      | labels     | reaction                                                                                                                                                                                                       | rate coefficient                                                            | reference |
|--------|------------|----------------------------------------------------------------------------------------------------------------------------------------------------------------------------------------------------------------|-----------------------------------------------------------------------------|-----------|
| J4401  | TrGCJ      | $\text{MVK} + h\nu \rightarrow \text{CH}_3\text{C}(\text{O})\text{OO} + \text{HCHO} + \text{CO} + \text{HO}_2$                                                                                                 | $0.019 * \text{jx}(\text{ip\_C0H2}) + 0.015 * \text{jx}(\text{ip\_MGLY0X})$ | see note  |
| J4402  | TrGCJ      | $\text{MVKOOH} + h\nu \rightarrow \text{OH} + .5 \text{ MGLY0X} + .25 \text{ CH}_3\text{COCH}_2\text{OH} + .75 \text{ HCHO} + .75 \text{ HO}_2 + .25 \text{ CH}_3\text{C}(\text{O})\text{OO} + .25 \text{ CO}$ | $\text{jx}(\text{ip\_CH300H})$                                              | see note  |
| J4403  | TrGCJ      | $\text{MEK} + h\nu \rightarrow \text{CH}_3\text{C}(\text{O})\text{OO} + \text{C}_2\text{H}_5\text{O}_2$                                                                                                        | $0.42 * \text{jx}(\text{ip\_CH0H})$                                         | see note  |
| J4404  | TrGCJ      | $\text{LMEKOOH} + h\nu \rightarrow \text{CH}_3\text{C}(\text{O})\text{OO} + \text{CH}_3\text{CHO} + \text{OH}$                                                                                                 | $\text{jx}(\text{ip\_CH300H})$                                              | see note  |
| J4405  | TrGCJ      | $\text{BIACET} + h\nu \rightarrow 2 \text{ CH}_3\text{C}(\text{O})\text{OO}$                                                                                                                                   | $2.15 * \text{jx}(\text{ip\_MGLY0X})$                                       | see note  |
| J4406  | TrGNCJ     | $\text{LC4H9NO3} + h\nu \rightarrow \text{NO}_2 + .67 \text{ MEK} + .67 \text{ HO}_2 + .33 \text{ C}_2\text{H}_5\text{O}_2 + .33 \text{ CH}_3\text{CHO}$                                                       | $3.7 * \text{jx}(\text{ip\_PAN})$                                           | see note  |
| J4500  | TrGCJ      | $\text{ISOOH} + h\nu \rightarrow \text{MVK} + \text{HCHO} + \text{HO}_2 + \text{OH}$                                                                                                                           | $\text{jx}(\text{ip\_CH300H})$                                              | see note  |
| J4501  | TrGNCJ     | $\text{ISON} + h\nu \rightarrow \text{MVK} + \text{HCHO} + \text{NO}_2 + \text{HO}_2$                                                                                                                          | $3.7 * \text{jx}(\text{ip\_PAN})$                                           | see note  |
| J6000  | StTrGClJ   | $\text{Cl}_2 + h\nu \rightarrow \text{Cl} + \text{Cl}$                                                                                                                                                         | $\text{jx}(\text{ip\_Cl2})$                                                 | see note  |
| J6100  | StTrGClJ   | $\text{Cl}_2\text{O}_2 + h\nu \rightarrow 2. \text{ LossO3} + 2 \text{ Cl}$                                                                                                                                    | $\text{jx}(\text{ip\_Cl202})$                                               | see note  |
| J6101  | StTrGClJ   | $\text{OClO} + h\nu \rightarrow 1. \text{ ProdO3} + \text{ClO} + \text{O}(^3\text{P})$                                                                                                                         | $\text{jx}(\text{ip\_OC10})$                                                | see note  |
| J6200  | StGClJ     | $\text{HCl} + h\nu \rightarrow \text{Cl} + \text{H}$                                                                                                                                                           | $\text{jx}(\text{ip\_HCl1})$                                                | see note  |
| J6201  | StTrGClJ   | $\text{HOCl} + h\nu \rightarrow \text{LossO3Cl} + 1. \text{ LossO3} + \text{OH} + \text{Cl}$                                                                                                                   | $\text{jx}(\text{ip\_HOC1})$                                                | see note  |
| J6300  | TrGNClJ    | $\text{ClNO}_2 + h\nu \rightarrow 1. \text{ ProdO3} + \text{Cl} + \text{NO}_2$                                                                                                                                 | $\text{jx}(\text{ip\_ClNO2})$                                               | see note  |
| J6301a | StTrGNClJ  | $\text{ClNO}_3 + h\nu \rightarrow \text{Cl} + \text{NO}_3$                                                                                                                                                     | $\text{jx}(\text{ip\_ClNO3})$                                               | see note  |
| J6301b | StTrGNClJ  | $\text{ClNO}_3 + h\nu \rightarrow \text{ClO} + \text{NO}_2$                                                                                                                                                    | $\text{jx}(\text{ip\_ClON02})$                                              | see note  |
| J6400  | StGClJ     | $\text{CH}_3\text{Cl} + h\nu \rightarrow 1.0 \text{ ProdLCl} + \text{Cl} + \text{CH}_3\text{O}_2$                                                                                                              | $\text{jx}(\text{ip\_CH3Cl1})$                                              | see note  |
| J6401  | StGClJ     | $\text{CCl}_4 + h\nu \rightarrow 4.0 \text{ ProdLCl} + 4 \text{ Cl}$                                                                                                                                           | $\text{jx}(\text{ip\_CC14})$                                                | see note  |
| J6402  | StGCClJ    | $\text{CH}_3\text{CCl}_3 + h\nu \rightarrow 3.0 \text{ ProdLCl} + 3 \text{ Cl}$                                                                                                                                | $\text{jx}(\text{ip\_CH3CC13})$                                             | see note  |
| J6500  | StGFClJ    | $\text{CFCl}_3 + h\nu \rightarrow 3.0 \text{ ProdLCl} + 3 \text{ Cl}$                                                                                                                                          | $\text{jx}(\text{ip\_CFC13})$                                               | see note  |
| J6501  | StGFClJ    | $\text{CF}_2\text{Cl}_2 + h\nu \rightarrow 2.0 \text{ ProdLCl} + 2 \text{ Cl}$                                                                                                                                 | $\text{jx}(\text{ip\_CF2Cl2})$                                              | see note  |
| J7000  | StTrGBrJ   | $\text{Br}_2 + h\nu \rightarrow \text{Br} + \text{Br}$                                                                                                                                                         | $\text{jx}(\text{ip\_Br2})$                                                 | see note  |
| J7100  | StTrGBrJ   | $\text{BrO} + h\nu \rightarrow \text{Br} + \text{O}(^3\text{P})$                                                                                                                                               | $\text{jx}(\text{ip\_Br0})$                                                 | see note  |
| J7200  | StTrGBrJ   | $\text{HOBr} + h\nu \rightarrow \text{LossO3Br} + 1. \text{ LossO3} + \text{Br} + \text{OH}$                                                                                                                   | $\text{jx}(\text{ip\_H0Br})$                                                | see note  |
| J7300  | TrGNBrJ    | $\text{BrNO}_2 + h\nu \rightarrow 1. \text{ ProdO3} + \text{Br} + \text{NO}_2$                                                                                                                                 | $\text{jx}(\text{ip\_BrNO2})$                                               | see note  |
| J7301  | StTrGNBrJ  | $\text{BrNO}_3 + h\nu \rightarrow 0.85 \text{ Br} + 0.85 \text{ NO}_3 + 0.15 \text{ BrO} + 0.15 \text{ NO}_2$                                                                                                  | $\text{jx}(\text{ip\_BrNO3})$                                               | see note  |
| J7400  | StGBrJ     | $\text{CH}_3\text{Br} + h\nu \rightarrow 1.0 \text{ ProdLBr} + \text{Br} + \text{CH}_3\text{O}_2$                                                                                                              | $\text{jx}(\text{ip\_CH3Br})$                                               | see note  |
| J7401  | TrGBrJ     | $\text{CH}_2\text{Br}_2 + h\nu \rightarrow 2.0 \text{ ProdsBr} + 2 \text{ Br}$                                                                                                                                 | $\text{jx}(\text{ip\_CH2Br2})$                                              | see note  |
| J7402  | TrGBrJ     | $\text{CHBr}_3 + h\nu \rightarrow 3.0 \text{ ProdsBr} + 3 \text{ Br}$                                                                                                                                          | $\text{jx}(\text{ip\_CHBr3})$                                               | see note  |
| J7500  | StGFBrJ    | $\text{CF}_3\text{Br} + h\nu \rightarrow 1.0 \text{ ProdLBr} + \text{Br}$                                                                                                                                      | $\text{jx}(\text{ip\_CF3Br})$                                               | see note  |
| J7600  | StTrGClBrJ | $\text{BrCl} + h\nu \rightarrow \text{Br} + \text{Cl}$                                                                                                                                                         | $\text{jx}(\text{ip\_BrCl1})$                                               | see note  |
| J7601  | StGFBrJ    | $\text{CF}_2\text{ClBr} + h\nu \rightarrow 1.0 \text{ ProdLBr} + 1.0 \text{ ProdLCl} + \text{Br} + \text{Cl}$                                                                                                  | $\text{jx}(\text{ip\_CF2ClBr})$                                             | see note  |

Table 2: Photolysis reactions (... continued)

| #        | labels   | reaction                                                                                                         | rate coefficient            | reference |
|----------|----------|------------------------------------------------------------------------------------------------------------------|-----------------------------|-----------|
| J7602    | TrGClBrJ | $\text{CH}_2\text{ClBr} + h\nu \rightarrow 1.0 \text{ ProdSBr} + 1.0 \text{ ProdSCl} + \text{Br} + \text{Cl}$    | <code>jx(ip_CH2ClBr)</code> | see note  |
| J7603    | TrGClBrJ | $\text{CHCl}_2\text{Br} + h\nu \rightarrow 1.0 \text{ ProdSBr} + 2.0 \text{ ProdSCl} + \text{Br} + 2 \text{ Cl}$ | <code>jx(ip_CHCl2Br)</code> | see note  |
| J7604    | TrGClBrJ | $\text{CHClBr}_2 + h\nu \rightarrow 2.0 \text{ ProdSBr} + 1.0 \text{ ProdSCl} + 2 \text{ Br} + \text{Cl}$        | <code>jx(ip_CHClBr2)</code> | see note  |
| J8401a   | TrGJ     | $\text{CH}_3\text{I} + h\nu \rightarrow \text{CH}_3\text{O}_2$                                                   | <code>JX(ip_CH3I)</code>    | see note  |
| J11J6500 | StGFClJ  | $(\text{CFCl}_3)_c + h\nu \rightarrow \dots$                                                                     | <code>jx(ip_CFC13)</code>   | see note  |
| J13J6501 | StGFClJ  | $(\text{CF}_2\text{Cl}_2)_c + h\nu \rightarrow \dots$                                                            | <code>jx(ip_CF2Cl2)</code>  | see note  |
| J16J3100 | UpStGNJ  | $(\text{N}_2\text{O})_c + h\nu \rightarrow \dots$                                                                | <code>jx(ip_N2O)</code>     | see note  |
| J19J6402 | StGCClJ  | $(\text{CH}_3\text{CCl}_3)_c + h\nu \rightarrow \dots$                                                           | <code>jx(ip_CH3CC13)</code> | see note  |
| J20J7601 | StGFBrJ  | $(\text{CF}_2\text{ClBr})_c + h\nu \rightarrow \dots$                                                            | <code>jx(ip_CF2ClBr)</code> | see note  |
| J21J7500 | StGFBrJ  | $(\text{CF}_3\text{Br})_c + h\nu \rightarrow \dots$                                                              | <code>jx(ip_CF3Br)</code>   | see note  |

\*Notes:

J-values are calculated with an external module and then supplied to the MECCA chemistry.

Values that originate from the Master Chemical Mechanism (MCM) by Rickard and Pascoe (2009) are translated according in the following way:

$\text{J}(11) \rightarrow \text{jx(ip\_COH2)}$   
 $\text{J}(12) \rightarrow \text{jx(ip\_CHOH)}$   
 $\text{J}(15) \rightarrow \text{jx(ip\_HOCH2CHO)}$   
 $\text{J}(18) \rightarrow \text{jx(ip\_MACR)}$   
 $\text{J}(22) \rightarrow \text{jx(ip\_ACETOL)}$

$\text{J}(23)+\text{J}(24) \rightarrow \text{jx(ip\_MVK)}$   
 $\text{J}(31)+\text{J}(32)+\text{J}(33) \rightarrow \text{jx(ip\_GLYOX)}$   
 $\text{J}(34) \rightarrow \text{jx(ip\_MGLYOX)}$   
 $\text{J}(41) \rightarrow \text{jx(ip\_CH300H)}$   
 $\text{J}(53) \rightarrow \text{J(iC}_3\text{H}_7\text{ONO}_2)$   
 $\text{J}(54) \rightarrow \text{J(iC}_3\text{H}_7\text{ONO}_2)$   
 $\text{J}(55) \rightarrow \text{J(iC}_3\text{H}_7\text{ONO}_2)$   
 $\text{J}(56)+\text{J}(57) \rightarrow \text{jx(ip\_NOA)}$

J4302: Following von Kuhlmann et al. (2003), we use  $\text{J}(\text{CH}_3\text{COCH}_2\text{OH}) = 0.11 * \text{jx(ip\_CHOH)}$ . As an additional factor, the quantum yield of 0.65 is taken from Orlando et al. (1999).

J4306: Following von Kuhlmann et al. (2003), we use  $\text{J}(\text{iC}_3\text{H}_7\text{ONO}_2) = 3.7 * \text{jx(ip\_PAN)}$ .

J4406: It is assumed that  $\text{J}(\text{LC4H9NO}_3)$  is the same as  $\text{J}(\text{iC}_3\text{H}_7\text{ONO}_2)$ .

J4405: It is assumed that  $\text{J}(\text{BIACET})$  is 2.15 times larger than  $\text{J}(\text{MGLYOX})$ , consistent with the photolysis rate coefficients used in the MCM (Rickard and Pascoe, 2009).

J7301: The quantum yields are recommended by Sander et al. (2011) for  $\lambda > 300\text{nm}$  and used here for the entire spectrum.

Table 3: Henry’s law coefficients

| substance                                    | $\frac{k_H^\ominus}{\text{M/atm}}$   | $\frac{-\Delta_{\text{soln}}H/R}{\text{K}}$ | reference                       |
|----------------------------------------------|--------------------------------------|---------------------------------------------|---------------------------------|
| O <sub>2</sub>                               | $1.3 \times 10^{-3}$                 | 1500.                                       | Wilhelm et al. (1977)           |
| O <sub>3</sub>                               | $1.2 \times 10^{-2}$                 | 2560.                                       | Chameides (1984)                |
| OH                                           | $3.0 \times 10^1$                    | 4300.                                       | Hanson et al. (1992)            |
| HO <sub>2</sub>                              | $3.9 \times 10^3$                    | 5900.                                       | Hanson et al. (1992)            |
| H <sub>2</sub> O <sub>2</sub>                | $1. \times 10^5$                     | 6338.                                       | Lind and Kok (1994)             |
| H <sub>2</sub> O                             | BIG                                  | 0.                                          | see note                        |
| NH <sub>3</sub>                              | 58.                                  | 4085.                                       | Chameides (1984)                |
| NO                                           | $1.9 \times 10^{-3}$                 | 1480.                                       | Schwartz and White (1981)       |
| NO <sub>2</sub>                              | $7.0 \times 10^{-3}$                 | 2500.                                       | Lee and Schwartz (1981)*        |
| NO <sub>3</sub>                              | 2.                                   | 2000.                                       | Thomas et al. (1993)            |
| N <sub>2</sub> O <sub>5</sub>                | BIG                                  | 0.                                          | see note                        |
| HONO                                         | $4.9 \times 10^1$                    | 4780.                                       | Schwartz and White (1981)       |
| HNO <sub>3</sub>                             | $2.45 \times 10^6 / 1.5 \times 10^1$ | 8694.                                       | Brimblecombe and Clegg (1989)*  |
| HNO <sub>4</sub>                             | $1.2 \times 10^4$                    | 6900.                                       | Régimbal and Mozurkewich (1997) |
| CH <sub>3</sub> OH                           | $2.20 \times 10^2$                   | 5200.                                       | Snider and Dawson (1985)        |
| CH <sub>3</sub> O <sub>2</sub>               | 6.                                   | 5600.                                       | Jacob (1986)*                   |
| CH <sub>3</sub> OOH                          | $3.0 \times 10^2$                    | 5322.                                       | Lind and Kok (1994)             |
| CO <sub>2</sub>                              | $3.1 \times 10^{-2}$                 | 2423.                                       | Chameides (1984)                |
| HCHO                                         | $7.0 \times 10^3$                    | 6425.                                       | Chameides (1984)                |
| HCOOH                                        | $3.7 \times 10^3$                    | 5700.                                       | Chameides (1984)                |
| CH <sub>3</sub> COOH                         | $4.1 \times 10^3$                    | 6200.                                       | Sander et al. (2006)            |
| PAN                                          | 2.8                                  | 5730.                                       | Sander et al. (2006)            |
| C <sub>2</sub> H <sub>5</sub> O <sub>2</sub> | 6.                                   | 5600.                                       | see note                        |
| CH <sub>3</sub> CHO                          | $1.29 \times 10^1$                   | 5890.                                       | Sander et al. (2006)            |
| CH <sub>3</sub> COCH <sub>3</sub>            | 28.1                                 | 5050.                                       | Sander et al. (2006)            |
| MGLYOX                                       | $3.70 \times 10^3$                   | 7500.                                       | ???                             |
| Cl <sub>2</sub>                              | $9.2 \times 10^{-2}$                 | 2081.                                       | Bartlett and Margerum (1999)    |
| HCl                                          | 2./1.7                               | 9001.                                       | Brimblecombe and Clegg (1989)   |
| HOCl                                         | $6.7 \times 10^2$                    | 5862.                                       | Huthwelker et al. (1995)        |
| ClNO <sub>3</sub>                            | BIG                                  | 0.                                          | see note                        |
| Br <sub>2</sub>                              | $7.7 \times 10^{-1}$                 | 3837.                                       | Bartlett and Margerum (1999)    |
| HBr                                          | 1.3                                  | 10239.                                      | Brimblecombe and Clegg (1989)*  |
| HOBr                                         | $9.3 \times 10^1$                    | 5862.                                       | Vogt et al. (1996)*             |

Table 3: Henry’s law coefficients (... continued)

| substance                         | $\frac{k_H^\ominus}{\text{M/atm}}$ | $\frac{-\Delta_{\text{soln}}H/R}{\text{K}}$ | reference                     |
|-----------------------------------|------------------------------------|---------------------------------------------|-------------------------------|
| BrNO <sub>3</sub>                 | BIG                                | 0.                                          | see note                      |
| BrCl                              | $9.4 \times 10^{-1}$               | 5600.                                       | Bartlett and Margerum (1999)  |
| SO <sub>2</sub>                   | 1.2                                | 3120.                                       | Chameides (1984)              |
| H <sub>2</sub> SO <sub>4</sub>    | $1. \times 10^{11}$                | 0.                                          | see note                      |
| CH <sub>3</sub> SO <sub>3</sub> H | BIG                                | 0.                                          | see note                      |
| DMS                               | $5.4 \times 10^{-1}$               | 3500.                                       | Staudinger and Roberts (2001) |
| DMSO                              | $5. \times 10^4$                   | 6425.                                       | De Bruyn et al. (1994)*       |

\*Notes:

The value “BIG” corresponds to virtually infinite solubility which is represented in the model using a very large but arbitrary number.

The temperature dependence of the Henry constants is:

$$K_H = K_H^\ominus \times \exp\left(\frac{-\Delta_{\text{soln}}H}{R} \left(\frac{1}{T} - \frac{1}{T^\ominus}\right)\right)$$

where  $\Delta_{\text{soln}}H$  = molar enthalpy of dissolution [J/mol] and  $R = 8.314 \text{ J}/(\text{mol K})$ .

NO<sub>2</sub>: The temperature dependence is from Chameides (1984).

HNO<sub>3</sub>: Calculated using the acidity constant from Davis and de Bruin (1964).

CH<sub>3</sub>O<sub>2</sub>: This value was estimated by Jacob (1986).

C<sub>2</sub>H<sub>5</sub>O<sub>2</sub>: Assumed to be the same as  $K_H(\text{CH}_3\text{O}_2)$ .

HBr: Calculated using the acidity constant from Lax (1969).

HOBr: This value was estimated by Vogt et al. (1996).

H<sub>2</sub>SO<sub>4</sub>: To account for the very high Henry’s law coefficient of H<sub>2</sub>SO<sub>4</sub>, a very high value was chosen arbitrarily.

DMSO: Lower limit cited from another reference.

Table 4: Accommodation coefficients

| substance                                    | $\alpha^\ominus$      | $\frac{-\Delta_{\text{obs}}H/R}{K}$ | reference                     |
|----------------------------------------------|-----------------------|-------------------------------------|-------------------------------|
| O <sub>2</sub>                               | 0.01                  | 2000.                               | see note                      |
| O <sub>3</sub>                               | 0.002                 | (default)                           | DeMore et al. (1997)*         |
| OH                                           | 0.01                  | (default)                           | Takami et al. (1998)*         |
| HO <sub>2</sub>                              | 0.5                   | (default)                           | Thornton and Abbatt (2005)    |
| H <sub>2</sub> O <sub>2</sub>                | 0.077                 | 3127.                               | Worsnop et al. (1989)         |
| H <sub>2</sub> O                             | 0.0                   | (default)                           | see note                      |
| NH <sub>3</sub>                              | 0.06                  | (default)                           | DeMore et al. (1997)*         |
| NO                                           | $5.0 \times 10^{-5}$  | (default)                           | Saastad et al. (1993)*        |
| NO <sub>2</sub>                              | 0.0015                | (default)                           | Ponche et al. (1993)*         |
| NO <sub>3</sub>                              | 0.04                  | (default)                           | Rudich et al. (1996)*         |
| N <sub>2</sub> O <sub>5</sub>                | (default)             | (default)                           | DeMore et al. (1997)*         |
| HONO                                         | 0.04                  | (default)                           | DeMore et al. (1997)*         |
| HNO <sub>3</sub>                             | 0.5                   | (default)                           | Abbatt and Waschewsky (1998)* |
| HNO <sub>4</sub>                             | (default)             | (default)                           | DeMore et al. (1997)*         |
| CH <sub>3</sub> OH                           | (default)             | (default)                           | see note                      |
| CH <sub>3</sub> O <sub>2</sub>               | 0.01                  | 2000.                               | see note                      |
| CH <sub>3</sub> OOH                          | 0.0046                | 3273.                               | Magi et al. (1997)            |
| CO <sub>2</sub>                              | 0.01                  | 2000.                               | see note                      |
| HCHO                                         | 0.04                  | (default)                           | DeMore et al. (1997)*         |
| HCOOH                                        | 0.014                 | 3978.                               | DeMore et al. (1997)          |
| CH <sub>3</sub> COOH                         | $2.0 \times 10^{-2}$  | 4079.                               | Davidovits et al. (1995)      |
| PAN                                          | (default)             | (default)                           | see note                      |
| C <sub>2</sub> H <sub>5</sub> O <sub>2</sub> | (default)             | (default)                           | see note                      |
| CH <sub>3</sub> CHO                          | $3.0 \times 10^{-2}$  | (default)                           | see note                      |
| CH <sub>3</sub> COCH <sub>3</sub>            | $3.72 \times 10^{-3}$ | 6395.                               | Davidovits et al. (1995)      |
| MGLYOX                                       | (default)             | (default)                           | see note                      |
| Cl <sub>2</sub>                              | 0.038                 | 6546.                               | Hu et al. (1995)              |
| HCl                                          | 0.074                 | 3072.                               | Schweitzer et al. (2000)*     |
| HOCl                                         | 0.5                   | (default)                           | see note                      |
| ClNO <sub>3</sub>                            | 0.108                 | (default)                           | Deiber et al. (2004)*         |
| Br <sub>2</sub>                              | 0.038                 | 6546.                               | Hu et al. (1995)              |
| HBr                                          | 0.032                 | 3940.                               | Schweitzer et al. (2000)*     |
| HOBr                                         | 0.5                   | (default)                           | Abbatt and Waschewsky (1998)* |
| BrNO <sub>3</sub>                            | 0.063                 | (default)                           | Deiber et al. (2004)*         |

Table 4: Accommodation coefficients (... continued)

| substance                         | $\alpha^\ominus$ | $\frac{-\Delta_{\text{obs}}H/R}{\text{K}}$ | reference              |
|-----------------------------------|------------------|--------------------------------------------|------------------------|
| BrCl                              | 0.038            | 6546.                                      | see note               |
| SO <sub>2</sub>                   | 0.11             | (default)                                  | DeMore et al. (1997)   |
| H <sub>2</sub> SO <sub>4</sub>    | 0.65             | (default)                                  | Pöschl et al. (1998)*  |
| CH <sub>3</sub> SO <sub>3</sub> H | 0.076            | 1762.                                      | De Bruyn et al. (1994) |
| DMS                               | (default)        | (default)                                  | see note               |
| DMSO                              | 0.048            | 2578.                                      | De Bruyn et al. (1994) |

\*Notes:

If no data are available, the following default values are used:

$$\alpha^\ominus = 0.1$$

$$-\Delta_{\text{obs}}H/R = 0 \text{ K}$$

The temperature dependence of the accommodation coefficients is given by (Jayne et al., 1991):

$$\frac{\alpha}{1-\alpha} = \exp\left(\frac{-\Delta_{\text{obs}}G}{RT}\right)$$

$$= \exp\left(\frac{-\Delta_{\text{obs}}H}{RT} + \frac{\Delta_{\text{obs}}S}{R}\right)$$

where  $\Delta_{\text{obs}}G$  is the Gibbs free energy barrier of the transition state toward solution (Jayne et al., 1991), and  $\Delta_{\text{obs}}H$  and  $\Delta_{\text{obs}}S$  are the corresponding enthalpy and entropy, respectively. The equation can be rearranged to:

$$\ln\left(\frac{\alpha}{1-\alpha}\right) = \frac{-\Delta_{\text{obs}}H}{R} \times \frac{1}{T} + \frac{-\Delta_{\text{obs}}S}{R}$$

and further:

$$\text{d} \ln\left(\frac{\alpha}{1-\alpha}\right) / \text{d}\left(\frac{1}{T}\right) = \frac{-\Delta_{\text{obs}}H}{R}$$

O<sub>2</sub>: Estimate.

O<sub>3</sub>: Value measured at 292 K.

OH: Value measured at 293 K.

NH<sub>3</sub>: Value measured at 295 K.

NO: Value measured between 193 and 243 K.

NO<sub>2</sub>: Value measured at 298 K.

NO<sub>3</sub>: Value is a lower limit, measured at 273 K.

N<sub>2</sub>O<sub>5</sub>: Value for sulfuric acid, measured between 195 and 300 K.

HONO: Value measured between 247 and 297 K.

HNO<sub>3</sub>: Value measured at room temperature. Abbatt and Waschewsky (1998) say  $\gamma > 0.2$ . Here  $\alpha = 0.5$  is used.

HNO<sub>4</sub>: Value measured at 200 K for water ice.

CH<sub>3</sub>O<sub>2</sub>: Estimate.

CO<sub>2</sub>: Estimate.

HCHO: Value measured between 260 and 270 K.

PAN: Estimate.

C<sub>2</sub>H<sub>5</sub>O<sub>2</sub>: Estimate.

CH<sub>3</sub>CHO: Using the same estimate as in the CAPRAM 2.4 model ([http://projects.tropos.de/capram/capram\\_24.html](http://projects.tropos.de/capram/capram_24.html)).

HCl: Temperature dependence derived from published data at 2 different temperatures

HOCl: Assumed to be the same as  $\alpha(\text{HOBr})$ .

ClNO<sub>3</sub>: Value measured at 274.5 K.

HBr: Temperature dependence derived from published data at 2 different temperatures

HOBr: Value measured at room temperature. Abbatt and Waschewsky (1998) say  $\gamma > 0.2$ . Here  $\alpha = 0.5$  is used.

BrNO<sub>3</sub>: Value measured at 273 K.

BrCl: Assumed to be the same as  $\alpha(\text{Cl}_2)$ .

H<sub>2</sub>SO<sub>4</sub>: Value measured at 303 K.

Table 5: Reversible (Henry’s law) equilibria and irreversible (“heterogenous”) uptake

| # | labels | reaction | rate coefficient | reference |
|---|--------|----------|------------------|-----------|
|---|--------|----------|------------------|-----------|

\*Notes:

The forward (**k\_exf**) and backward (**k\_exb**) rate coefficients are calculated in the file **messy\_mecca\_aero.f90** using the accommodation coefficients in subroutine **mecca\_aero\_alpha** and Henry’s law constants in subroutine **mecca\_aero\_henry**.

$k_{mt}$  = mass transfer coefficient

lwc = liquid water content of aerosol mode

H3201, H6300, H6301, H6302, H7300, H7301, H7302, H7601, H7602: For uptake of X ( $X = \text{N}_2\text{O}_5$ ,  $\text{ClNO}_3$ , or  $\text{BrNO}_3$ ) and subsequent reaction with  $\text{H}_2\text{O}$ ,  $\text{Cl}^-$ , and  $\text{Br}^-$ , we define:

$$k_{\text{exf}}(\text{X}) = \frac{k_{\text{mt}}(\text{X}) \times \text{LWC}}{[\text{H}_2\text{O}] + 5 \times 10^2 [\text{Cl}^-] + 3 \times 10^5 [\text{Br}^-]}$$

The total uptake rate of X is only determined by  $k_{\text{mt}}$ . The factors only affect the branching between hy-

drolysis and the halide reactions. The factor  $5 \times 10^2$  was chosen such that the chloride reaction dominates over hydrolysis at about  $[\text{Cl}^-] > 0.1 \text{ M}$  (see Fig. 3 in Behnke et al. (1997)), i.e. when the ratio  $[\text{H}_2\text{O}]/[\text{Cl}^-]$  is less than  $5 \times 10^2$ . The ratio  $5 \times 10^2 / 3 \times 10^5$  was chosen such that the reactions with chloride and bromide are roughly equal for sea water composition (Behnke et al., 1994).

Table 6: Heterogeneous reactions

| #      | labels     | reaction                                                                                                      | rate coefficient                    | reference |
|--------|------------|---------------------------------------------------------------------------------------------------------------|-------------------------------------|-----------|
| HET200 | StHetN     | $\text{N}_2\text{O}_5 + \text{H}_2\text{O} \rightarrow \text{LossO3N} + 1. \text{ LossO3} + 2 \text{ HNO}_3$  | <code>khet_St(ihs_N205_H20)</code>  | see note  |
| HET201 | TrHetN     | $\text{N}_2\text{O}_5 \rightarrow 3. \text{ LossO3} + 2 \text{ NO}_3^-(\text{aq}) + 2 \text{ H}^+(\text{aq})$ | <code>khet_Tr(iht_N205)</code>      | see note  |
| HET410 | StHetCl    | $\text{HOCl} + \text{HCl} \rightarrow \text{LossO3Cl} + 1. \text{ LossO3} + \text{Cl}_2 + \text{H}_2\text{O}$ | <code>khet_St(ihs_HOCl_HCl)</code>  | see note  |
| HET420 | StHetNCl   | $\text{ClNO}_3 + \text{HCl} \rightarrow \text{LossO3Cl} + 1. \text{ LossO3} + \text{Cl}_2 + \text{HNO}_3$     | <code>khet_St(ihs_ClNO3_HCl)</code> | see note  |
| HET421 | StHetNCl   | $\text{ClNO}_3 + \text{H}_2\text{O} \rightarrow \text{HOCl} + \text{HNO}_3$                                   | <code>khet_St(ihs_ClNO3_H20)</code> | see note  |
| HET422 | StHetNCl   | $\text{N}_2\text{O}_5 + \text{HCl} \rightarrow 2. \text{ LossO3} + \text{ClNO}_2 + \text{HNO}_3$              | <code>khet_St(ihs_N205_HCl)</code>  | see note  |
| HET510 | StHetBr    | $\text{HOBr} + \text{HBr} \rightarrow \text{LossO3Br} + 1. \text{ LossO3} + \text{Br}_2 + \text{H}_2\text{O}$ | <code>khet_St(ihs_HOBr_HBr)</code>  | see note  |
| HET520 | StHetNBr   | $\text{BrNO}_3 + \text{H}_2\text{O} \rightarrow \text{HOBr} + \text{HNO}_3$                                   | <code>khet_St(ihs_BrNO3_H20)</code> | see note  |
| HET540 | StHetNClBr | $\text{ClNO}_3 + \text{HBr} \rightarrow \text{LossO3Cl} + 1. \text{ LossO3} + \text{BrCl} + \text{HNO}_3$     | <code>khet_St(ihs_ClNO3_HBr)</code> | see note  |
| HET541 | StHetNClBr | $\text{BrNO}_3 + \text{HCl} \rightarrow \text{LossO3Br} + 1. \text{ LossO3} + \text{BrCl} + \text{HNO}_3$     | <code>khet_St(ihs_BrNO3_HCl)</code> | see note  |
| HET542 | StHetClBr  | $\text{HOCl} + \text{HBr} \rightarrow \text{LossO3Cl} + 1. \text{ LossO3} + \text{BrCl} + \text{H}_2\text{O}$ | <code>khet_St(ihs_HOCl_HBr)</code>  | see note  |
| HET543 | StHetClBr  | $\text{HOBr} + \text{HCl} \rightarrow \text{LossO3Br} + 1. \text{ LossO3} + \text{BrCl} + \text{H}_2\text{O}$ | <code>khet_St(ihs_HOBr_HCl)</code>  | see note  |

\*Notes:

Heterogeneous reaction rates are calculated with an external module and then supplied to the MECCA chemistry (see [www.messy-interface.org](http://www.messy-interface.org) for details)

Table 7: Acid-base and other equilibria

| # | labels | reaction | $K_0[M^{m-n}]$ | $-\Delta H/R[K]$ | reference |
|---|--------|----------|----------------|------------------|-----------|
|---|--------|----------|----------------|------------------|-----------|

\*Notes:

Table 8: Aqueous phase reactions

| # | labels | reaction | $k_0$ [ $M^{1-n}s^{-1}$ ] | $-E_a/R[K]$ | reference |
|---|--------|----------|---------------------------|-------------|-----------|
|---|--------|----------|---------------------------|-------------|-----------|

\*Notes:

## References

- Abbatt, J. P. D. and Waschewsky, G. C. G.: Heterogeneous interactions of HOBr, HNO<sub>3</sub>, O<sub>3</sub>, and NO<sub>2</sub> with deliquescent NaCl aerosols at room temperature, *J. Phys. Chem. A*, 102, 3719–3725, 1998.
- Anderson, L. C. and Fahey, D. W.: Studies with ClONO<sub>2</sub>: Thermal dissociation rate and catalytic conversion to NO using an NO/O<sub>3</sub> chemiluminescence detector, *J. Phys. Chem.*, 94, 644–652, 1990.
- Aranda, A., Le Bras, G., La Verdet, G., and Poulet, G.: The BrO + CH<sub>3</sub>O<sub>2</sub> reaction: Kinetics and role in the atmospheric ozone budget, *Geophys. Res. Lett.*, 24, 2745–2748, 1997.
- Atkinson, R.: Gas-phase tropospheric chemistry of volatile organic compounds: 1. Alkanes and alkenes, *J. Phys. Chem. Ref. Data*, 26, 215–290, 1997.
- Atkinson, R.: Kinetics of the gas-phase reactions of OH radicals with alkanes and cycloalkanes, *Atmos. Chem. Phys.*, 3, 2233–2307, 2003.
- Atkinson, R., Baulch, D. L., Cox, R. A., Hampson, Jr., R. F., Kerr, J. A., Rossi, M. J., and Troe, J.: Summary of evaluated kinetic and photochemical data for atmospheric chemistry: Web version August 1999, <http://iupac.pole-ether.fr>, 1999.
- Atkinson, R., Baulch, D. L., Cox, R. A., Crowley, J. N., Hampson, R. F., Hynes, R. G., Jenkin, M. E., Rossi, M. J., and Troe, J.: Evaluated kinetic and photochemical data for atmospheric chemistry: Volume I – gas phase reactions of O<sub>x</sub>, HO<sub>x</sub>, NO<sub>x</sub> and SO<sub>x</sub> species, *Atmos. Chem. Phys.*, 4, 1461–1738, 2004.
- Atkinson, R., Baulch, D. L., Cox, R. A., Crowley, J. N., Hampson, Jr., R. F., Hynes, R. G., Jenkin, M. E., Kerr, J. A., Rossi, M. J., and Troe, J.: Summary of evaluated kinetic and photochemical data for atmospheric chemistry: Web version March 2005, <http://iupac.pole-ether.fr>, 2005.
- Atkinson, R., Baulch, D. L., Cox, R. A., Crowley, J. N., Hampson, R. F., Hynes, R. G., Jenkin, M. E., Rossi, M. J., and Troe, J.: Evaluated kinetic and photochemical data for atmospheric chemistry: Volume II – gas phase reactions of organic species, *Atmos. Chem. Phys.*, 6, 3625–4055, 2006.
- Atkinson, R., Baulch, D. L., Cox, R. A., Crowley, J. N., Hampson, R. F., Hynes, R. G., Jenkin, M. E., Rossi, M. J., and Troe, J.: Evaluated kinetic and photochemical data for atmospheric chemistry: Volume III – gas phase reactions of inorganic halogens, *Atmos. Chem. Phys.*, 7, 981–1191, 2007.
- Barone, S. B., Turnipseed, A. A., and Ravishankara, A. R.: Role of adducts in the atmospheric oxidation of dimethyl sulfide, *Faraday Discuss.*, 100, 39–54, 1995.
- Bartlett, W. P. and Margerum, D. W.: Temperature dependencies of the Henry’s law constant and the aqueous phase dissociation constant of bromine chloride, *Environ. Sci. Technol.*, 33, 3410–3414, 1999.
- Bedjanian, Y., Laverdet, G., and Le Bras, G.: Low-pressure study of the reaction of Cl atoms with isoprene, *J. Phys. Chem. A*, 102, 953–959, 1998.
- Behnke, W., Scheer, V., and Zetzsch, C.: Production of BrNO<sub>2</sub>, Br<sub>2</sub> and ClNO<sub>2</sub> from the reaction between sea spray aerosol and N<sub>2</sub>O<sub>5</sub>, *J. Aerosol Sci.*, 25, S277–S278, 1994.
- Behnke, W., George, C., Scheer, V., and Zetzsch, C.: Production and decay of ClNO<sub>2</sub> from the reaction of gaseous N<sub>2</sub>O<sub>5</sub> with NaCl solution: Bulk and aerosol experiments, *J. Geophys. Res.*, 102D, 3795–3804, 1997.
- Boyd, A. A., Flaud, P.-M., Daugey, N., and Lesclaux, R.: Rate constants for RO<sub>2</sub> + HO<sub>2</sub> reactions measured under a large excess of HO<sub>2</sub>, *J. Phys. Chem. A*, 107, 818–821, 2003.
- Brimblecombe, P. and Clegg, S. L.: Erratum, *J. Atmos. Chem.*, 8, 95, 1989.
- Canosa-Mas, C. E., King, M. D., Lopez, R., Percival, C. J., Wayne, R. P., Shallcross, D. E., Pyle, J. A., and Daele, V.: Is the reaction between CH<sub>3</sub>(O)O<sub>2</sub> and NO<sub>3</sub> important in the night-time troposphere?, *J. Chem. Soc. Faraday Trans.*, 92, 2211–2222, 1996.
- Chameides, W. L.: The photochemistry of a remote marine stratiform cloud, *J. Geophys. Res.*, 89D, 4739–4755, 1984.
- Christensen, L. E., Okumura, M., Sander, S. P., Salawitch, R. J., Toon, G. C., Sen, B., Blavier, J.-F., and Jucks, K. W.: Kinetics of HO<sub>2</sub> + HO<sub>2</sub> → H<sub>2</sub>O<sub>2</sub> + O<sub>2</sub>: Implications for stratospheric H<sub>2</sub>O<sub>2</sub>, *Geophys. Res. Lett.*, 29, doi:10.1029/2001GL014525, 2002.
- Clyne, M. A. A. and Cruse, H. W.: Atomic resonance fluorescence spectrometry for the rate constants of rapid bimolecular reactions. Part 2. Reactions Cl + BrCl, Cl + Br<sub>2</sub>, Cl + ICl, Br + IBr, Br + ICl, *J. Chem. Soc. Faraday Trans. 2*, 68, 1377–1387, 1972.
- Davidovits, P., Hu, J. H., Worsnop, D. R., Zahniser, M. S., and Kolb, C. E.: Entry of gas molecules into liquids, *Faraday Discuss.*, 100, 65–81, 1995.
- Davis, Jr., W. and de Bruin, H. J.: New activity coefficients of 0–100 per cent aqueous nitric acid, *J. Inorg. Nucl. Chem.*, 26, 1069–1083, 1964.

- De Bruyn, W. J., Shorter, J. A., Davidovits, P., Worsnop, D. R., Zahniser, M. S., and Kolb, C. E.: Uptake of gas-phase sulfur species methanesulfonic acid, dimethylsulfoxide, and dimethyl sulfone by aqueous surfaces, *J. Geophys. Res.*, 99D, 16 927–16 932, 1994.
- Deiber, G., George, C., Le Calvé, S., Schweitzer, F., and Mirabel, P.: Uptake study of  $\text{ClONO}_2$  and  $\text{BrONO}_2$  by halide containing droplets, *Atmos. Chem. Phys.*, 4, 1291–1299, 2004.
- DeMore, W. B., Sander, S. P., Golden, D. M., Hampson, R. F., Kurylo, M. J., Howard, C. J., Ravishankara, A. R., Kolb, C. E., and Molina, M. J.: Chemical kinetics and photochemical data for use in stratospheric modeling. Evaluation number 12, JPL Publication 97-4, Jet Propulsion Laboratory, Pasadena, CA, 1997.
- Dillon, T. J., Horowitz, A., Hölscher, D., Crowley, J. N., Vereecken, L., and Peeters, J.: Reaction of HO with hydroxyacetone ( $\text{HOCH}_2\text{C}(\text{O})\text{CH}_3$ ): rate coefficients (233–363 K) and mechanism, *Phys. Chem. Chem. Phys.*, 8, 236–246, 2006.
- Dolson, D. A. and Leone, S. R.: A reinvestigation of the laser-initiated chlorine/hydrogen bromide chain reaction: absolute rate constants and the  $v = 2/v = 1$  ratio from chlorine atom + hydrogen bromide  $\rightarrow$  hydrogen chloride( $v$ ) + bromine atom, *J. Phys. Chem.*, 91, 3543–3550, 1987.
- Hanson, D. R., Burkholder, J. B., Howard, C. J., and Ravishankara, A. R.: Measurement of OH and  $\text{HO}_2$  radical uptake coefficients on water and sulfuric acid surfaces, *J. Phys. Chem.*, 96, 4979–4985, 1992.
- Hu, J. H., Shi, Q., Davidovits, P., Worsnop, D. R., Zahniser, M. S., and Kolb, C. E.: Reactive uptake of  $\text{Cl}_2(\text{g})$  and  $\text{Br}_2(\text{g})$  by aqueous surfaces as a function of  $\text{Br}^-$  and  $\text{I}^-$  ion concentration: The effect of chemical reaction at the interface, *J. Phys. Chem.*, 99, 8768–8776, 1995.
- Huthwelker, T., Clegg, S. L., Peter, T., Carslaw, K., Luo, B. P., and Brimblecombe, P.: Solubility of  $\text{HOCl}$  in water and aqueous  $\text{H}_2\text{SO}_4$  to stratospheric temperatures, *J. Atmos. Chem.*, 21, 81–95, 1995.
- Hynes, A. J. and Wine, P. H.: The atmospheric chemistry of dimethylsulfoxide (DMSO) kinetics and mechanism of the OH + DMSO reaction, *J. Atmos. Chem.*, 24, 23–37, 1996.
- Ingham, T., Bauer, D., Sander, R., Crutzen, P. J., and Crowley, J. N.: Kinetics and products of the reactions  $\text{BrO} + \text{DMS}$  and  $\text{Br} + \text{DMS}$  at 298 K, *J. Phys. Chem. A*, 103, 7199–7209, 1999.
- Jacob, D. J.: Chemistry of OH in remote clouds and its role in the production of formic acid and peroxy-monosulfate, *J. Geophys. Res.*, 91D, 9807–9826, 1986.
- Jayne, J. T., Duan, S. X., Davidovits, P., Worsnop, D. R., Zahniser, M. S., and Kolb, C. E.: Uptake of gas-phase alcohol and organic acid molecules by water surfaces, *J. Phys. Chem.*, 95, 6329–6336, 1991.
- Jefferson, A., Nicovich, J. M., and Wine, P. H.: Temperature-dependent kinetics studies of the reactions  $\text{Br}(^2\text{P}_{3/2}) + \text{CH}_3\text{SCH}_3 \leftrightarrow \text{CH}_3\text{SCH}_2 + \text{HBr}$ . Heat of formation of the  $\text{CH}_3\text{SCH}_2$  radical, *J. Phys. Chem.*, 98, 7128–7135, 1994.
- Kircher, C. C. and Sander, S. P.: Kinetics and mechanism of  $\text{HO}_2$  and  $\text{DO}_2$  disproportionations, *J. Phys. Chem.*, 88, 2082–2091, 1984.
- Kirchner, F. and Stockwell, W. R.: Effect of peroxy radical reactions on the predicted concentrations of ozone, nitrogenous compounds, and radicals, *J. Geophys. Res.*, 101D, 21 007–21 022, 1996.
- Kohlmann, J.-P. and Poppe, D.: The tropospheric gas-phase degradation of  $\text{NH}_3$  and its impact on the formation of  $\text{N}_2\text{O}$  and  $\text{NO}_x$ , *J. Atmos. Chem.*, 32, 397–415, 1999.
- Kondo, O. and Benson, S. W.: Kinetics and equilibria in the system  $\text{Br} + \text{CH}_3\text{OOH} \rightleftharpoons \text{HBr} + \text{CH}_3\text{OO}$ . An upper limit for the heat of formation of the methylperoxy radical, *J. Phys. Chem.*, 88, 6675–6680, 1984.
- Lax, E.: Taschenbuch für Chemiker und Physiker, Springer Verlag, Berlin, 1969.
- Lee, Y.-N. and Schwartz, S. E.: Reaction kinetics of nitrogen dioxide with liquid water at low partial pressure, *J. Phys. Chem.*, 85, 840–848, 1981.
- Lind, J. A. and Kok, G. L.: Correction to “Henry’s law determinations for aqueous solutions of hydrogen peroxide, methylhydroperoxide, and peroxyacetic acid” by John A. Lind and Gregory L. Kok, *J. Geophys. Res.*, 99D, 21 119, 1994.
- Magi, L., Schweitzer, F., Pallares, C., Cherif, S., Mirabel, P., and George, C.: Investigation of the uptake rate of ozone and methyl hydroperoxide by water surfaces, *J. Phys. Chem. A*, 101, 4943–4949, 1997.
- Manion, J. A., Huie, R. E., Levin, R. D., Burgess, Jr., D. R., Orkin, V. L., Tsang, W., McGivern, W. S., Hudgens, J. W., Knyazev, V. D., Atkinson, D. B., Chai, E., Tereza, A. M., Lin, C.-Y., Allison, T. C., Mallard, W. G., Westley, F., Herron, J. T., Hampson, R. F., and Frizzell, D. H.: NIST Chemical Kinetics Database (Web Version), <http://kinetics.nist.gov>, 2010.

- McCabe, D. C., Gierczak, T., Talukdar, R. K., and Ravishankara, A. R.: Kinetics of the reaction  $\text{OH} + \text{CO}$  under atmospheric conditions, *Geophys. Res. Lett.*, 28, 3135–3138, 2001.
- Müller, J.-F. and Brasseur, G.: IMAGES: A three-dimensional chemical transport model of the global troposphere, *J. Geophys. Res.*, 100D, 16 445–16 490, 1995.
- Orlando, J. J. and Tyndall, G. S.: Rate coefficients for the thermal decomposition of  $\text{BrONO}_2$  and the heat of formation of  $\text{BrONO}_2$ , *J. Phys. Chem.*, 100, 19 398–19 405, 1996.
- Orlando, J. J., Tyndall, G. S., Fracheboud, J. M., Estupinan, E. G., Haberkorn, S., and Zimmer, A.: The rate and mechanism of the gas-phase oxidation of hydroxyacetone, *Atmos. Environ.*, 33, 1621–1629, 1999.
- Orlando, J. J., Tyndall, G. S., Bertman, S. B., Chen, W., and Burkholder, J. B.: Rate coefficient for the reaction of  $\text{OH}$  with  $\text{CH}_2=\text{C}(\text{CH}_3)\text{C}(\text{O})\text{OONO}_2$  (MPAN), *Atmos. Environ.*, 36, 1895–1900, 2002.
- Ponche, J. L., George, C., and Mirabel, P.: Mass transfer at the air/water interface: Mass accommodation coefficients of  $\text{SO}_2$ ,  $\text{HNO}_3$ ,  $\text{NO}_2$  and  $\text{NH}_3$ , *J. Atmos. Chem.*, 16, 1–21, 1993.
- Pöschl, U., Canagaratna, M., Jayne, J. T., Molina, L. T., Worsnop, D. R., Kolb, C. E., and Molina, M. J.: Mass accommodation coefficient of  $\text{H}_2\text{SO}_4$  vapor on aqueous sulfuric acid surfaces and gaseous diffusion coefficient of  $\text{H}_2\text{SO}_4$  in  $\text{N}_2/\text{H}_2\text{O}$ , *J. Phys. Chem. A*, 102, 10 082–10 089, 1998.
- Pöschl, U., von Kuhlmann, R., Poisson, N., and Crutzen, P. J.: Development and intercomparison of condensed isoprene oxidation mechanisms for global atmospheric modeling, *J. Atmos. Chem.*, 37, 29–52, 2000.
- Régimbal, J.-M. and Mozurkewich, M.: Peroxynitric acid decay mechanisms and kinetics at low pH, *J. Phys. Chem. A*, 101, 8822–8829, 1997.
- Rickard, A. and Pascoe, S.: The Master Chemical Mechanism (MCM), <http://mcm.leeds.ac.uk>, 2009.
- Rudich, Y., Talukdar, R. K., Imamura, T., Fox, R. W., and Ravishankara, A. R.: Uptake of  $\text{NO}_3$  on KI solutions: Rate coefficient for the  $\text{NO}_3 + \text{I}^-$  reaction and gas-phase diffusion coefficients for  $\text{NO}_3$ , *Chem. Phys. Lett.*, 261, 467–473, 1996.
- Saastad, O. W., Ellermann, T., and Nielsen, C. J.: On the adsorption of  $\text{NO}$  and  $\text{NO}_2$  on cold  $\text{H}_2\text{O}/\text{H}_2\text{SO}_4$  surfaces, *Geophys. Res. Lett.*, 20, 1191–1193, 1993.
- Sander, S. P., Friedl, R. R., Golden, D. M., Kurylo, M. J., Moortgat, G. K., Keller-Rudek, H., Wine, P. H., Ravishankara, A. R., Kolb, C. E., Molina, M. J., Finlayson-Pitts, B. J., Huie, R. E., and Orkin, V. L.: Chemical Kinetics and Photochemical Data for Use in Atmospheric Studies, Evaluation Number 15, JPL Publication 06-2, Jet Propulsion Laboratory, Pasadena, CA, <http://jpldataeval.jpl.nasa.gov>, 2006.
- Sander, S. P., Abbatt, J., Barker, J. R., Burkholder, J. B., Friedl, R. R., Golden, D. M., Huie, R. E., Kolb, C. E., Kurylo, M. J., Moortgat, G. K., Orkin, V. L., and Wine, P. H.: Chemical Kinetics and Photochemical Data for Use in Atmospheric Studies, Evaluation No. 17, JPL Publication 10-6, Jet Propulsion Laboratory, Pasadena, <http://jpldataeval.jpl.nasa.gov>, 2011.
- Schwartz, S. E. and White, W. H.: Solubility equilibria of the nitrogen oxides and oxyacids in dilute aqueous solution, in: *Advances in Environmental Science and Engineering*, edited by Pfafflin, J. R. and Ziegler, E. N., vol. 4, pp. 1–45, Gordon and Breach Science Publishers, NY, 1981.
- Schweitzer, F., Mirabel, P., and George, C.: Uptake of hydrogen halides by water droplets, *J. Phys. Chem. A*, 104, 72–76, 2000.
- Sivakumaran, V., Hölscher, D., Dillon, T. J., and Crowley, J. N.: Reaction between  $\text{OH}$  and  $\text{HCHO}$ : temperature dependent rate coefficients (202–399 K) and product pathways (298 K), *Phys. Chem. Chem. Phys.*, 5, 4821–4827, 2003.
- Snider, J. R. and Dawson, G. A.: Tropospheric light alcohols, carbonyls, and acetonitrile: Concentrations in the southwestern United States and Henry’s law data, *J. Geophys. Res.*, 90D, 3797–3805, 1985.
- Staudinger, J. and Roberts, P. V.: A critical compilation of Henry’s law constant temperature dependence relations for organic compounds in dilute aqueous solutions, *Chemosphere*, 44, 561–576, 2001.
- Takami, A., Kato, S., Shimono, A., and Koda, S.: Uptake coefficient of  $\text{OH}$  radical on aqueous surface, *Chem. Phys.*, 231, 215–227, 1998.
- Thomas, K., Volz-Thomas, A., and Kley, D.: Zur Wechselwirkung von  $\text{NO}_3$ -Radikalen mit wässrigen Lösungen: Bestimmung des Henry- und des Massenakkommodationskoeffizienten, Ph.D. thesis, Institut für Chemie und Dynamik der Geosphäre 2, Forschungszentrum Jülich GmbH, Germany, 1993.
- Thornton, J. and Abbatt, J. P. D.: Measurements of  $\text{HO}_2$  uptake to aqueous aerosol: Mass accommoda-

- tion coefficients and net reactive loss, *J. Geophys. Res.*, 110D, doi:10.1029/2004JD005402, 2005.
- Tyndall, G. S., Staffelbach, T. A., Orlando, J. J., and Calvert, J. G.: Rate coefficients for the reactions of OH radicals with methylglyoxal and acetaldehyde, *Int. J. Chem. Kinetics*, 27, 1009–1020, 1995.
- Tyndall, G. S., Cox, R. A., Granier, C., Lesclaux, R., Moortgat, G. K., Pilling, M. J., Ravishankara, A. R., and Wallington, T. J.: The atmospheric chemistry of small organic peroxy radicals, *J. Geophys. Res.*, 106D, 12 157–12 182, 2001.
- Vogt, R., Crutzen, P. J., and Sander, R.: A mechanism for halogen release from sea-salt aerosol in the remote marine boundary layer, *Nature*, 383, 327–330, doi:10.1038/383327A0, 1996.
- von Kuhlmann, R.: Tropospheric photochemistry of ozone, its precursors and the hydroxyl radical: A 3D-modeling study considering non-methane hydrocarbons, Ph.D. thesis, Johannes Gutenberg-Universität, Mainz, Germany, 2001.
- von Kuhlmann, R., Lawrence, M. G., Crutzen, P. J., and Rasch, P. J.: A model for studies of tropospheric ozone and nonmethane hydrocarbons: Model description and ozone results, *J. Geophys. Res.*, 108D, doi: 10.1029/2002JD002893, 2003.
- Wilhelm, E., Battino, R., and Wilcock, R. J.: Low-pressure solubility of gases in liquid water, *Chem. Rev.*, 77, 219–262, 1977.
- Worsnop, D. R., Zahniser, M. S., Kolb, C. E., Gardner, J. A., Watson, L. R., van Doren, J. M., Jayne, J. T., and Davidovits, P.: The temperature dependence of mass accommodation of SO<sub>2</sub> and H<sub>2</sub>O<sub>2</sub> on aqueous surfaces, *J. Phys. Chem.*, 93, 1159–1172, 1989.
- Zaveri, R. A. and Peters, L. K.: A new lumped structure photochemical mechanism for large-scale applications, *J. Geophys. Res.*, 104D, 30 387–30 415, 1999.
